# Supplementary material for: Similarities and differences in gene expression profiles of BRCA1 methylated and mutated epithelial ovarian cancers
Source: Front Oncol. 2023 Oct 3;13:1268127. doi: 10.3389/fonc.2023.1268127 (PMC10579792; doi:10.3389/fonc.2023.1268127)
Supplement: Supplementary file 2 [file Table_1.xlsx]

## Sheet: Suppl Table 1
ID nanostring	ID_LAB	groups	groups_analysis	groups	histotype	age	germBRCA	NOMENCL HGVS	proteina HGVS	exon	mutation type	Family History (FH)	BRCA1 met	BRCA1 met (%)	BRCA2 met	BRCA2 met (%)	BRCA1 (log2)	BRCA2 (log2)	BRIP1 (log2)	DDB2 (log2)	DTX3L (log2)	EXO1 (log2)	FANCA (log2)	H2AFX (log2)	HELLS (log2)	MGMT (log2)	MRE11 (log2)	MSH2 (log2)	PARP12 (log2)	PARP9 (log2)	RAD51 (log2)	TYMS (log2)	UBE2C (log2)	UBE2T (log2)	WDR76 (log2)
39	17	MET	group C	BRCA2met	HGSC	70	wt						U	0	M	44.07	5.954	6.34	5.781	7.516	9.162	6.15	6.539	7.577	8.119	8.7	7.833	8.704	7.607	8.883	7.098	8.728	7.57	6.34	5.7
46	38	UNMET NO MUT	group A, reference	BRCAwt	EC high grade	47	wt					no	U	0	U	0	5.907	6.555	6.524	7.807	9.547	6.672	7.19	8.18	7.238	9.441	9.2	10.089	9.297	9.257	5.954	8.823	8.214	8.114	4.954
10	43	MUT GERM	group B, positive group		HGSC	49	BRCA1	c.1687C>T	p.Gln563*	11	N	yes	U	0	U	0	5.781	7.476	5.781	8.592	10.025	7.5	6.954	7.476	7.476	8.883	8.752	8.823	8.145	9.66	7.459	8.539	8.185	7.248	6.375
35	53	MUT GERM	group B, positive group		HGSC	43	BRCA1	c.3253dupA	p.Arg1085Lysfs*8	11	FS	yes	U	0	U	0	5.833	7.913	6.768	8.492	9.596	8.145	8.992	8.683	8.861	8.889	8.585	9.585	8.651	8.898	7.285	11.44	9.253	8.459	6.087
36	59	MUT GERM	group B, positive group		HGSC	59	BRCA1	c.181T>G	p.(Cys61Gly)	2	M	yes	U	0	U	0	5.459	6.17	5.492	8.679	9.937	5.426	6.728	7.238	6.977	9.262	8.43	8.886	8.714	9.602	6.585	7.637	7	6.781	6.066
24	49	MUT GERM	group B, positive group		HGSC	50	BRCA1	c.(4185+1_4186-1)_(4357+1_4358-1)dup	p.(Val1454Glufs*7)	13	dup	yes	U	0.98	U	3.1	6.229	6.989	7.57	7.775	10.271	5.585	6.492	8.969	7.468	8.951	8.997	9.324	9.347	10.229	7.022	8.731	8.679	7.687	6.658
23	48	MUT GERM	group B, positive group		HGSC	47	BRCA1	c.(4185+1_4186-1)_(4357+1_4358-1)dup	p.(Val1454Glufs*7)	13	dup	yes	U	2.75	U	0	6.426	8.129	8.145	8.983	9.801	7.839	7.983	8.735	8.317	9.806	9.598	8.928	9.695	9.783	7.087	10.249	9.243	8.484	6.931
22	47	MUT GERM	group B, positive group		HGSC	51	BRCA1	c.5266dupC	p.(Gln1756Profs*74)	18	FS	yes	U	3.1	U	2.83	5.807	6.409	6.794	8.476	9.457	6.248	6.57	7.539	7.392	9.129	9.255	9.457	9.071	8.948	6.392	8.124	7.644	6.87	5.931
12	45	MUT GERM	group B, positive group		HGSC	43	BRCA1	c.1953_1956delGAAA	p.(Lys653Serfs*47)	11	FS	no	U	3.13	U	3.13	5.524	6.358	5.977	8.082	9.844	5.044	5.807	7.15	5.672	9.295	9.527	9.757	8.508	9.243	5.858	6.989	6.409	6.585	4.954
7	26	UNMET NO MUT	group A, reference	BRCAwt	HGSC	67	wt					no	U	3.83	U	3.63	6.741	6.087	6.19	7.907	10	6.781	7.794	8.555	7.531	9.403	9.644	10.535	9.297	9.549	7.257	10.785	8.945	7.5	5.833
9	42	MUT GERM	group B, positive group		HGSC	44	BRCA1	c.5123C>A	p.(Ala1708Glu)	18	M	yes	U	3.87	U	2.55	8.349	8.2	9.592	9.498	10.819	9.209	10.063	10.028	8.994	10.471	10.296	10.638	9.822	10.537	8.607	10.707	10.518	10.112	8.811
11	44	MUT GERM	group B, positive group		HGSC	49	BRCA1	c.2350_2351delTC	p.Ser784Valfs*5	11	FS	no	U	4	U	2.61	6.304	7.925	8.496	9.082	11.3	7.508	7.735	8.496	8.414	10.004	9.031	10.19	9.412	11.189	7.409	10.024	9.331	7.989	7.839
28	12	MET	group C	BRCA2met	CC	58	wt					no	U	4.17	M	34.31	6.044	6.229	6.57	8.34	9.718	5.672	6.443	7.443	7.562	9.18	8.2	9.082	8.243	9.333	5.17	8.243	7.119	6.392	4.392
47	39	UNMET NO MUT	group A, reference	BRCAwt	EC high grade	52	wt					no	U	4.2	U	0	6.476	5.858	7.665	7.304	8.033	6.358	6.409	6.977	7.577	8.384	7.547	7.366	7.577	7.644	6.109	8.886	8.248	6.989	5.426
48	40	UNMET NO MUT	group A, reference	BRCAwt	HGSC	64	wt					no	U	4.33	U	3.4	6	7.14	7.714	8.093	9.185	8.175	6.392	7.735	7.937	8.14	8.098	8.823	8.762	7.87	6.6	8.731	7.994	7.775	6.34
6	25	UNMET NO MUT	group A, reference	BRCAwt	EC low grade	54	wt					no	U	4.43	U	3.03	7.077	7.209	7.109	9.119	9.786	6.615	7.814	8.439	7.672	9.165	9.285	9.622	8.2	9.631	6.508	8.662	8.175	7.524	6.17
18	22	UNMET NO MUT	group A, reference	BRCAwt	HGSC	58	wt					no	U	5	U	7.17	4.7	3.907	4.322	8.566	8.071	3.585	4.248	6.087	5.781	8.16	7.524	7.644	6.426	7.451	4	4.807	4	6.044	3.585
21	46	MUT GERM	group B, positive group		HGSC	57	BRCA1	c.68_69delAG	p.Glu23Valfs*17	1	FS	no	U	5.43	U	3.96	6.492	6.794	7.304	8.484	10.074	7.16	8	9.082	7.524	8.974	8.592	9.375	8.426	9.541	7.468	8.845	9.646	8.129	7.322
31	30	UNMET NO MUT	group A, reference	BRCAwt	HGSC	68	wt					no	U	5.9	U	3.77	5.644	5.322	5.129	10.086	9.157	4.755	5.459	6.954	6.508	10.062	7.901	7.989	7.229	9.16	5.322	8.476	4.7	5.755	4.755
20	29	UNMET NO MUT	group A, reference	BRCAwt	HGSC	75	wt					no	U	5.97	U	5.13	5.907	6.375	6.426	8.669	10.181	6.524	6.658	7.248	6.17	8.155	9.333	8.88	8.271	9.672	6.492	7.066	7.96	7.524	5.883
43	23	UNMET NO MUT	group A, reference	BRCAwt	HGSC	38	wt					no	U	6.3	U	0	5.931	6.109	6.741	10.269	8.945	5	6.375	7.6	6.781	9.288	8.093	7.877	7.229	8.577	5.426	8.577	6.714	6.248	5.392
29	13	MET	group C	BRCA2met	HGSC	63	wt					no	U	7.33	M	58.3	5.755	6.34	7.109	8.48	9.972	6.15	7.651	7.948	8.044	9.195	8.375	9.711	8.919	9.901	6.248	8.484	8.14	6.781	7.119
44	36	UNMET NO MUT	group A, reference	BRCAwt	HGSC	55	wt					no	U	8	U	4.83	6.129	6.304	6.34	8.707	9.132	5.858	6.358	7.87	6.248	8.322	8.05	8.039	7.721	9.308	6.977	7.721	8.326	6.555	5.555
45	37	UNMET NO MUT	group A, reference	BRCAwt	EC high grade	69	wt					yes	U	9.73	U	10.16	5.907	6.087	5.248	8.948	9.512	5.977	7.285	6.409	6.833	8.626	7.801	7.972	6.858	8.64	6.714	7.304	6.209	6.524	6.6
8	27	UNMET NO MUT	group A, reference	BRCAwt	HGSC	48	wt					no	U	9.77	U	4	5.728	7.679	6.409	8.48	10.952	7.687	7.741	7.592	7.592	8.476	8.814	8.901	9.222	10.628	6.714	8.011	8.69	7.209	5.907
19	28	UNMET NO MUT	group A, reference	BRCAwt	CC	49	wt					no	U	10	U	5.3	5.459	4.858	5.209	8.447	7.524	4.954	5.248	6.066	5.555	7.044	6.6	6.687	6.066	7.267	4.807	6.409	4.807	5.248	4.248
17	21	UNMET NO MUT	group A, reference	BRCAwt	EC high grade	44	wt					no	U	10.8	U	8.5	6.585	6.34	5.883	8.335	8.349	6.267	7.033	7.539	6.807	8.527	7.622	8.276	6.755	7.748	6.672	7.972	7.864	7.322	5.426
34	34	UNMET NO MUT	group A, reference	BRCAwt	HGSC	55	wt					no	U	11	U	7.1	6.022	8.488	7.19	9.313	10.165	7.794	8.858	8.637	7.276	7.755	9.142	9.202	9.85	10.062	7.295	8.693	9.765	7.735	6.459
33	33	UNMET NO MUT	group A, reference	BRCAwt	EC low grade	49	wt					no	U	12	U	0	5.087	4.087	4.17	7.82	8.524	3.7	5.358	6	4.459	6.539	6.87	7.384	6.919	8.195	4.459	5.248	4.524	4.954	4.087
32	31	UNMET NO MUT	group A, reference	BRCAwt	EC low grade	33	wt					no	U	14	U	3.4	4.807	4.17	4.392	8.88	7.858	4	4.524	5.883	4.17	7.919	6.807	6.82	6.768	7.2	4.644	5.781	3.585	4.954	3.459
37	15	MET	group C	BRCA1met	HGSC	72	wt					no	M	20.73	na	na	5.248	5.781	5.209	9.453	8.257	4.459	6	6.539	6.644	8.88	8.129	8.214	6.768	7.852	5.248	6.883	5.555	6.392	4
16	8	MET	group C	BRCA1met	HGSC	50	wt					no	M	23.68	U	4.28	4.807	8.119	6.954	8.647	10.412	7.794	8.459	7.19	7.827	9.979	9.494	10.021	8.88	9.809	6.87	9.514	8.524	6.845	6.629
13	5	MET	group C	BRCA1met	HGSC	57	wt					no	M	30.63	U	3.57	4.644	7.257	5.833	8.679	9.714	6.476	7.15	7.547	6.672	9.822	7.954	7.16	9.055	9.418	6.267	7.468	8.322	7.044	5.807
30	14	MET	group C	BRCA1met	HGSC	59	wt					no	M	31.07	U	0	4.585	6.409	5.977	7.748	9.674	6.044	6.658	7.109	7.033	9.276	9.129	9.278	8.281	9.116	6.267	6.658	7.679	6.943	6.267
25	9	MET	group C	BRCA1met	EC high grade	62	wt					no	M	34.03	U	4	5.209	7.977	7.741	9.231	10.058	7.907	8.43	8.335	8.622	10.525	9.42	8.845	9.394	9.82	8.443	10.19	9.672	8.633	6.807
27	11	MET	group C	BRCA1met	EC low grade	54	wt					no	M	35.87	U	5.73	4.17	6.585	6.15	8.19	9.185	7.044	6.443	7.781	7.484	8.017	7.7	8.214	8.17	8.422	6.129	7.516	7.055	7.18	5.555
42	20	MET	group C	BRCA1/2met	EC high grade	54	wt					no	M	42.07	M	46.6	4.858	6.19	5.977	8.418	8.951	6.931	6.82	8.362	7.679	8.262	7.129	7.721	6.989	8.714	5.392	7.877	8.276	7.109	5.931
14	6	MET	group C	BRCA1met	HGSC	46	wt					no	M	42.2	U	3.2	5.322	7.714	7.907	7.827	9.711	8.098	7.714	7.375	7.768	10.358	9.783	9.017	8.637	9.333	7.7	9.74	9.098	8.119	6.392
40	18	MET	group C	BRCA1met	HGSC	63	wt					no	M	49.47	U	2.77	3.7	5.672	6.15	8.124	8.304	6.044	6.285	7.943	7.2	8.801	7.954	7.877	6.728	8.022	5.755	7.814	7.687	6.17	5.322
26	10	MET	group C	BRCA1met	HGSC	67	wt					no	M	52.37	U	4.33	4.585	7.768	8.017	8.451	11.12	7.435	7.672	8.34	7.304	9.09	8.611	9.57	9.986	11.013	6.7	9.18	8.913	7.622	5.392
15	7	MET	group C	BRCA1met	EC high grade	41	wt					no	M	55.47	U	10	4.807	6.977	6.19	8.253	9.594	6.87	8.397	7.768	6.6	9.524	10.033	9.185	8.997	9.2	6.555	7.615	8.615	7.907	4.644
5	4	MET	group C	BRCA1met	HGSC	51	wt					no	M	58.53	U	2.5	5.044	8.19	7.375	8.622	10.653	6.943	7.592	8.087	7.622	9.999	9.585	10.589	9.044	10.518	7.331	9.676	9.617	8.011	6.615
38	16	MET	group C	BRCA1met	HGSC	64	wt					no	M	64.77	U	4.1	4.087	6.539	6.109	7.547	8.535	6.375	6.229	7.468	6.066	7.741	8.276	7.304	7.508	7.714	5.492	6.375	6.87	5.977	4.907
2	1	MET	group C	BRCA1met	HGSC	63	wt					no	M	65.4	U	4.9	6.129	8.804	8.165	8.672	10.329	8.358	8.738	9.455	8.948	9.983	9.716	10.285	9.539	10.058	8.547	10.401	10.73	9.451	7.665
41	19	MET	group C	BRCA1met	HGSC	57	wt					no	M	65.63	U	4.13	6.248	7.011	8.344	7.484	10.444	8.531	8.344	9.948	9.02	10.17	9.605	10.583	9.638	10.337	7.129	10.176	10.458	8.794	6.7
3	2	MET	group C	BRCA1met	HGSC	67	wt					no	M	80.23	U	0	5.555	7.943	8.539	8.951	11.038	7.741	8.951	9.172	9.656	9.984	9.77	11.058	9.437	10.882	7.492	9.838	9.526	8.34	5.977
4	3	MET	group C	BRCA1met	HGSC	41	wt					no	M	91.47	U	3.9	4.954	7.615	7.547	8.676	10.501	7.418	7.762	8.957	7.672	9.369	10.471	10.45	8.997	10.389	6.966	9.806	9.512	7.665	5.858
