# Supplementary material for: Similarities and differences in gene expression profiles of BRCA1 methylated and mutated epithelial ovarian cancers
Source: Front Oncol. 2023 Oct 3;13:1268127. doi: 10.3389/fonc.2023.1268127 (PMC10579792; doi:10.3389/fonc.2023.1268127)
Supplement: Supplementary file 3 [file Table_2.xlsx]

## Sheet: Foglio2
Supplementary Table 2. Pathways included in IO360 (Table modified from NanoString® material)
	Annotation (number of genes)	Pathways Represented
1	Release of Cancer Cell Antigens (74)	Microsatellite Instability (MSI)
		Double Strand Break Repair
		Chromatin Modification/Epigenetics
		DNA Damage Repair
2	Cancer Antigen Presentation (101)	MHC Class-I/II genes
		Non-MHC Antigen Presentation
		Antigen Processing Machinery
		Proteasome and Immunoproteosome
		Cross-presenting Dendritic Cell Genes
3	T-cell Priming and Activation (150)	Costimulatory Molecules
4	Immune Cell Localization to Tumors (292)	Chemokines
		Integrins
		Selectins
		Immune Cell Populations in Tumors
5	Stromal Factors (102)	Extracellular Matrix Remodeling
		Collagens
		Angiogenesis
		Metastasis
6	Recognition of Cancer Cells by T-cells (105)	Immune checkpoints
7	Killing of Cancer Cells (179)	Interferon Signaling
		JAK-STAT1/2 Pathway
		Cytolytic Activity
		Phagocytosis
8	Myeloid Cell Activity (260)	Inflammation
		Fc-gamma Receptor Signaling
9	NK Cell Activity (28)
10	Cell Cycle and Proliferation (54)
11	Tumor-Intrinsic Factors (155)	Apoptosis
		Autophagy
		Nutrient Depletion
		Metastasis
12	Immunometabolism (101)	Oxygen Sensing
		Nutrient regulation
13	Common Signaling Pathways (162)	Wnt
		Hedgehog
		TGF-beta
		NF-kappaB
		Notch
		PI3K-Akt
		RAS
		MAPK
14	Internal Reference Genes (20)
