# Supplementary material for: Similarities and differences in gene expression profiles of BRCA1 methylated and mutated epithelial ovarian cancers
Source: Front Oncol. 2023 Oct 3;13:1268127. doi: 10.3389/fonc.2023.1268127 (PMC10579792; doi:10.3389/fonc.2023.1268127)
Supplement: Supplementary file 4 [file Table_3.xlsx]

## Sheet: All genes
"All Genes" results table provides the fold-change values for each signature used to generate the Figure 3 (lower part).
This table reports the signature name, Log(2) transformed fold change, 95% lower confidence of the mean limit, 95% upper confidence of the mean limit,
students t-test distribution score, unadjusted significance (p-value), and significance adjusted for multiple tests (FDR).
name	DNA damage/repair genes	EOC class	logFC BRCA1mut	lcl95 BRCA1mut	ucl95 BRCA1mut	t statistic BRCA1mut	pvalue BRCA1mut	padjust BRCA1mut	logFC BRCA1met	lcl95 BRCA1met	ucl95 BRCA1met	t statistic BRCA1met	pvalue BRCA1met	padjust BRCA1met
BAMBI		both	-2.212	-3.536	-0.8888	-3.366	0.001561	0.9578	-1.895	-3.034	-0.7556	-3.35	0.001638	1
IHH		both	-2.175	-3.552	-0.7974	-3.18	0.002659	1	-1.732	-2.917	-0.5464	-2.942	0.005125	1
DKK1		both	-2.09	-3.465	-0.7144	-3.06	0.003713	1	-2.331	-3.514	-1.147	-3.965	0.0002579	1
FGF9		both	-1.758	-2.812	-0.7039	-3.358	0.001597	0.9578	-1.377	-2.284	-0.4697	-3.056	0.003748	1
TNFRSF10C	X	both	-1.63	-2.655	-0.6049	-3.202	0.002497	1	-1.82	-2.703	-0.9381	-4.155	0.0001424	1
COL17A1		both	-1.615	-2.873	-0.3564	-2.584	0.01305	1	-1.704	-2.786	-0.6208	-3.168	0.002746	1
PLA1A		both	-1.522	-2.412	-0.6313	-3.442	0.001253	0.9578	-1.523	-2.289	-0.7564	-4.002	0.0002302	1
KIR3DL2		both	-1.34	-2.344	-0.3361	-2.688	0.01002	1	-1.206	-2.07	-0.342	-2.811	0.007273	1
CDKN1A		both	-1.299	-2.045	-0.5519	-3.502	0.00105	0.9578	-1.672	-2.314	-1.029	-5.238	4.08e-06	1
HNF1A		both	-1.198	-2.299	-0.09787	-2.193	0.0335	1	-1.29	-2.237	-0.3426	-2.742	0.008708	1
GLI1		both	-1.197	-2.249	-0.1455	-2.292	0.02659	1	-1.008	-1.913	-0.1026	-2.242	0.0299	1
DEFB134		both	-1.143	-2.051	-0.2349	-2.535	0.01478	1	-1.307	-2.089	-0.5259	-3.369	0.00155	1
DLL1		both	-1.077	-1.902	-0.2516	-2.628	0.01169	1	-1.313	-2.023	-0.6029	-3.723	0.0005419	1
BMP2		both	-1.06	-1.806	-0.3137	-2.86	0.006384	1	-1.581	-2.223	-0.9383	-4.955	1.052e-05	1
STC1		both	-1.017	-1.838	-0.1964	-2.496	0.01628	1	-1.597	-2.303	-0.8906	-4.553	3.958e-05	0.6977
FAM124B		both	-0.9914	-1.663	-0.3194	-2.971	0.00474	1	-1.107	-1.685	-0.5282	-3.853	0.0003651	0.9834
MAPK10		both	-0.9819	-1.833	-0.1311	-2.324	0.02467	1	-0.934	-1.666	-0.2017	-2.568	0.01358	1
ITGA1		both	-0.8795	-1.697	-0.06166	-2.166	0.03565	1	-0.8439	-1.548	-0.1401	-2.414	0.01986	1
BNIP3L		both	-0.861	-1.614	-0.1082	-2.303	0.02591	1	-0.8657	-1.514	-0.2178	-2.69	0.009955	1
BCL2		both	-0.8549	-1.66	-0.04989	-2.138	0.0379	1	-0.9513	-1.644	-0.2585	-2.765	0.0082	1
IGF2R		both	-0.7895	-1.218	-0.3608	-3.708	0.0005665	0.9578	-0.5703	-0.9392	-0.2013	-3.112	0.00321	1
ITGA6		both	-0.7723	-1.313	-0.2312	-2.874	0.006151	1	-0.559	-1.025	-0.09324	-2.417	0.01974	1
PF4		both	-0.7479	-1.482	-0.01363	-2.051	0.04606	1	-0.7377	-1.37	-0.1057	-2.351	0.02315	1
PDGFA		both	-0.7279	-1.306	-0.1495	-2.534	0.0148	1	-0.7121	-1.21	-0.2143	-2.881	0.006043	1
TNFRSF10D	X	both	-0.6998	-1.356	-0.04395	-2.149	0.03704	1	-0.7846	-1.349	-0.2202	-2.799	0.007501	1
MLANA		both	-0.6857	-1.356	-0.01542	-2.06	0.04516	1	-0.6347	-1.212	-0.05782	-2.216	0.03179	1
PTPN11		both	-0.5269	-0.872	-0.1817	-3.074	0.003572	1	-0.4012	-0.6983	-0.1041	-2.72	0.00923	1
MRE11	X	both	0.4772	0.02134	0.9332	2.108	0.04059	1	0.4808	0.08839	0.8732	2.467	0.01745	1
E2F3		both	0.5565	0.1076	1.005	2.497	0.01624	1	0.4591	0.07278	0.8455	2.393	0.02091	1.215e-05
HELLS	X	both	0.6212	0.01438	1.228	2.061	0.04503	1	0.672	0.1497	1.194	2.591	0.01283	1
UBE2T	X	both	0.6382	0.09509	1.181	2.366	0.0223	1	0.4691	0.001603	0.9365	2.021	0.04925	1
BRCA2	X	both	0.7104	0.09301	1.328	2.317	0.02507	1	0.8071	0.2757	1.338	3.059	0.003725	1
HMGA1	X	both	0.7253	0.1134	1.337	2.387	0.02123	1	0.6307	0.104	1.157	2.412	0.02	1
CD40		both	0.8581	0.09232	1.624	2.256	0.02891	1	0.6664	0.007371	1.325	2.036	0.0476	1
EZH2		both	0.8593	0.2638	1.455	2.906	0.005649	1	0.6331	0.1206	1.146	2.488	0.0166	1
IRF7		both	0.8903	0.1785	1.602	2.519	0.01538	1	0.7015	0.08889	1.314	2.306	0.02575	1
IL6R		both	0.9275	0.2285	1.627	2.672	0.01044	1	0.6583	0.05674	1.26	2.204	0.03267	0.5894
EIF2AK2		both	0.9612	0.392	1.53	3.4	0.001413	0.9578	0.7559	0.266	1.246	3.107	0.003257	1
KIF2C		both	0.9613	0.1064	1.816	2.264	0.02838	1	0.8821	0.1463	1.618	2.414	0.01987	1
CENPF		both	0.9822	0.2766	1.688	2.803	0.00742	1	0.794	0.1868	1.401	2.633	0.01153	1
GBP1		both	0.9999	0.007912	1.992	2.03	0.04828	1	0.8841	0.03024	1.738	2.085	0.04273	1
MKI67		both	1.031	0.249	1.813	2.655	0.0109	1	1.07	0.3966	1.743	3.2	0.002507	1
OASL		both	1.11	0.2064	2.013	2.474	0.01718	1	0.9356	0.1581	1.713	2.423	0.01943	1
CDC20		both	1.115	0.3196	1.91	2.823	0.007045	1	1.044	0.36	1.729	3.073	0.00358	1
UBE2C	X	both	1.115	0.1676	2.063	2.37	0.02211	1	1.243	0.4273	2.058	3.069	0.00362	1
RSAD2		both	1.195	0.3134	2.076	2.73	0.008989	1	0.9571	0.1986	1.715	2.541	0.01454	1
ICAM5		both	1.269	0.1081	2.431	2.201	0.03286	1	1.572	0.5725	2.571	3.167	0.002753	1
CDC25C		both	1.28	0.4521	2.108	3.113	0.003204	1	1.002	0.2891	1.715	2.831	0.006904	1
PPARGC1B		both	1.422	0.6951	2.149	3.94	0.0002792	0.7535	1.407	0.7818	2.033	4.53	4.261e-05	1
CRABP2		both	2.053	1.017	3.089	3.991	0.000238	0.7535	1.458	0.5668	2.35	3.294	0.001923	1
CXCL10		both	2.101	0.4476	3.754	2.559	0.01391	1	1.86	0.4371	3.283	2.632	0.01155	1
CXCL11		both	2.246	0.5149	3.978	2.612	0.01215	1	1.613	0.1228	3.103	2.18	0.03452	1
HLA-DQA1		both	3.306	0.2023	6.409	2.145	0.03735	1	2.696	0.02544	5.367	2.033	0.04795	1
AREG		BRCA1met	-0.5717	-1.882	0.7391	-0.8782	0.3845	1	-1.931	-3.059	-0.8031	-3.447	0.001233	1
CXCL14		BRCA1met	-1.48	-3.335	0.3745	-1.607	0.115	1	-1.885	-3.481	-0.2881	-2.377	0.02173	1
PROM1		BRCA1met	-1.555	-3.207	0.09711	-1.895	0.06443	1	-1.671	-3.093	-0.2488	-2.366	0.02232	1
SERPINA1		BRCA1met	-0.4737	-1.725	0.7776	-0.7623	0.4498	1	-1.43	-2.507	-0.353	-2.674	0.01039	1
BRCA1	X	BRCA1met	-0.1604	-0.5755	0.2548	-0.7778	0.4407	1	-1.318	-1.676	-0.9611	-7.431	2.25e-09	1
TNFRSF11B		BRCA1met	-0.7007	-1.961	0.5597	-1.12	0.2688	1	-1.316	-2.401	-0.2313	-2.443	0.01852	1
REN		BRCA1met	0.06073	-1.166	1.287	0.09969	0.921	1	-1.3	-2.356	-0.2443	-2.48	0.01693	1
EIF5AL1	X	BRCA1met	-0.5544	-1.364	0.2555	-1.378	0.1748	1	-1.234	-1.931	-0.5373	-3.566	0.0008691	1
SNCA		BRCA1met	-0.7719	-1.722	0.1782	-1.636	0.1088	1	-1.167	-1.985	-0.3495	-2.874	0.006144	1
S100A12		BRCA1met	-0.9686	-2.044	0.1069	-1.814	0.07637	1	-1.157	-2.083	-0.2315	-2.517	0.01542	1
TWIST1		BRCA1met	0.04382	-0.7637	0.8513	0.1093	0.9135	1	-1.138	-1.833	-0.443	-3.297	0.001903	1
PTGS2		BRCA1met	-0.9168	-1.907	0.07362	-1.864	0.0688	1	-1.127	-1.98	-0.2751	-2.664	0.01067	1
MET		BRCA1met	-1.044	-2.255	0.1658	-1.738	0.08902	1	-1.123	-2.165	-0.08161	-2.171	0.03517	1
KIT		BRCA1met	-0.9148	-1.865	0.03558	-1.938	0.05883	1	-1.122	-1.94	-0.3045	-2.763	0.008242	1
IFNA1		BRCA1met	-0.85	-1.969	0.2689	-1.53	0.133	1	-1.122	-2.085	-0.1592	-2.347	0.02337	1
NGFR		BRCA1met	-0.6596	-1.658	0.3387	-1.33	0.19	1	-1.104	-1.963	-0.2448	-2.588	0.01294	1
TPSAB1/B2		BRCA1met	-0.5347	-1.692	0.6227	-0.9303	0.3572	1	-1.086	-2.082	-0.08976	-2.195	0.03331	0.8964
CXCR2		BRCA1met	-0.5736	-1.328	0.1807	-1.531	0.1327	1	-1.08	-1.729	-0.4307	-3.35	0.001638	1
NT5E		BRCA1met	0.0674	-1.024	1.158	0.1244	0.9016	1	-1.059	-1.998	-0.1195	-2.27	0.02801	1
IL6		BRCA1met	-0.7013	-1.792	0.389	-1.295	0.2018	1	-1.036	-1.974	-0.09754	-2.223	0.03124	1
CCL22		BRCA1met	-0.9692	-1.98	0.04179	-1.93	0.05982	1	-1.027	-1.897	-0.157	-2.377	0.02174	1
TGFB2		BRCA1met	-0.6851	-1.644	0.2736	-1.439	0.157	1	-1.003	-1.828	-0.178	-2.448	0.01829	1
HEY1		BRCA1met	-0.7351	-1.635	0.1648	-1.645	0.1069	1	-0.9906	-1.765	-0.2161	-2.576	0.01334	1
FZD9		BRCA1met	-0.8491	-1.759	0.06038	-1.88	0.06654	1	-0.9899	-1.773	-0.2071	-2.546	0.01435	1
CPA3		BRCA1met	-0.0635	-0.8522	0.7252	-0.1621	0.8719	1	-0.945	-1.624	-0.2662	-2.803	0.007418	1
CDH11		BRCA1met	-0.3528	-1.426	0.7203	-0.662	0.5113	1	-0.9442	-1.868	-0.02057	-2.059	0.04531	1
GHR		BRCA1met	-0.6732	-1.448	0.1016	-1.75	0.08696	1	-0.9389	-1.606	-0.2721	-2.835	0.006815	1
CD36		BRCA1met	-0.6621	-1.734	0.4102	-1.243	0.2201	1	-0.9375	-1.86	-0.01463	-2.046	0.04662	1
MS4A2		BRCA1met	-0.6929	-1.486	0.1004	-1.759	0.08537	1	-0.9324	-1.615	-0.2495	-2.75	0.00854	0.8746
CSF3		BRCA1met	-0.6518	-1.452	0.1487	-1.64	0.108	1	-0.925	-1.614	-0.236	-2.703	0.009626	1
GNG4		BRCA1met	-0.8264	-1.789	0.1361	-1.729	0.09063	1	-0.916	-1.744	-0.08762	-2.227	0.03098	1
PPARG		BRCA1met	-0.746	-1.612	0.1201	-1.734	0.08964	1	-0.9041	-1.65	-0.1586	-2.442	0.01856	0.6859
CEACAM3		BRCA1met	-0.5167	-1.292	0.2589	-1.341	0.1864	1	-0.8946	-1.562	-0.2272	-2.699	0.009738	1
BBC3		BRCA1met	-0.5146	-1.194	0.1646	-1.526	0.1341	1	-0.8888	-1.473	-0.3042	-3.062	0.003694	1
APLNR		BRCA1met	-0.4556	-1.214	0.3027	-1.21	0.2326	1	-0.8856	-1.538	-0.233	-2.733	0.008926	1
IL33		BRCA1met	-0.4673	-1.181	0.247	-1.317	0.1943	1	-0.8833	-1.498	-0.2686	-2.894	0.005835	1
OLFML2B		BRCA1met	0.06432	-0.6434	0.7721	0.183	0.8556	1	-0.844	-1.453	-0.2349	-2.79	0.007678	1
NCR1		BRCA1met	-0.3709	-1.115	0.373	-1.004	0.3207	1	-0.8394	-1.48	-0.1991	-2.64	0.01133	1
TNFRSF18		BRCA1met	-0.5194	-1.388	0.3487	-1.205	0.2345	1	-0.8278	-1.575	-0.08062	-2.231	0.03067	1
ITGA2		BRCA1met	-0.6745	-1.451	0.1017	-1.75	0.08692	1	-0.8084	-1.476	-0.1403	-2.437	0.01881	1
MAGEA1	X	BRCA1met	-0.7252	-1.503	0.05278	-1.877	0.06695	1	-0.8035	-1.473	-0.1339	-2.416	0.01976	0.6977
TSLP		BRCA1met	-0.6219	-1.362	0.118	-1.693	0.09741	1	-0.7967	-1.434	-0.1599	-2.519	0.01535	1
CD44		BRCA1met	-0.7437	-1.583	0.09563	-1.784	0.08108	1	-0.7869	-1.509	-0.06451	-2.193	0.03344	1
CCL14		BRCA1met	0.1046	-0.7113	0.9205	0.2582	0.7974	1	-0.7772	-1.479	-0.075	-2.229	0.03083	1
C5		BRCA1met	-0.5893	-1.34	0.1611	-1.581	0.1207	1	-0.767	-1.413	-0.1211	-2.391	0.02099	1
SOX10		BRCA1met	-0.3244	-1.022	0.373	-0.9367	0.3539	1	-0.7489	-1.349	-0.1486	-2.512	0.01562	1
IL4		BRCA1met	-0.7892	-1.62	0.04211	-1.912	0.06225	1	-0.7385	-1.454	-0.02303	-2.078	0.04335	1
THBD		BRCA1met	-0.4389	-1.023	0.1456	-1.512	0.1374	1	-0.7248	-1.228	-0.2218	-2.901	0.005716	0.6977
TWIST2		BRCA1met	-0.7289	-1.501	0.0434	-1.901	0.06373	1	-0.7039	-1.369	-0.03926	-2.133	0.0384	1
SELE		BRCA1met	-0.08226	-0.8045	0.6399	-0.2294	0.8196	1	-0.6992	-1.321	-0.07762	-2.265	0.02833	1
IL22RA1		BRCA1met	-0.3804	-1.112	0.3513	-1.047	0.3007	1	-0.672	-1.302	-0.0422	-2.149	0.03704	1
TGFB3		BRCA1met	-0.5697	-1.228	0.08873	-1.742	0.08823	1	-0.6606	-1.227	-0.09391	-2.347	0.02333	1
TLR4		BRCA1met	-0.6253	-1.268	0.01755	-1.959	0.05632	1	-0.6502	-1.203	-0.09696	-2.367	0.02228	1
TNFRSF10B	X	BRCA1met	-0.4917	-1.075	0.09119	-1.699	0.09624	1	-0.6501	-1.152	-0.1485	-2.61	0.01224	1
EGFR		BRCA1met	-0.2825	-0.9602	0.3951	-0.8396	0.4055	1	-0.6405	-1.224	-0.05728	-2.211	0.03209	1
CXorf36		BRCA1met	-0.1131	-0.6112	0.3849	-0.4574	0.6496	1	-0.6229	-1.051	-0.1942	-2.926	0.005346	1
FAS		BRCA1met	-0.3281	-0.8808	0.2247	-1.195	0.2382	1	-0.6166	-1.092	-0.1409	-2.61	0.01222	1
CSF2		BRCA1met	-0.1917	-0.8703	0.4868	-0.569	0.5722	1	-0.6165	-1.201	-0.03252	-2.126	0.039	1
DAB2		BRCA1met	-0.1364	-0.7116	0.4388	-0.4774	0.6353	1	-0.6123	-1.107	-0.1172	-2.49	0.01649	1
BAX		BRCA1met	-0.4082	-0.8414	0.02509	-1.897	0.0642	1	-0.6078	-0.9807	-0.2349	-3.282	0.001986	1
BATF3		BRCA1met	-0.3144	-0.8965	0.2677	-1.088	0.2825	1	-0.6077	-1.109	-0.1067	-2.443	0.01854	1
DDB2	X	BRCA1met	-0.5101	-1.145	0.1253	-1.617	0.1129	1	-0.5902	-1.137	-0.04337	-2.173	0.03501	1
HIF1A		BRCA1met	-0.3881	-0.9019	0.1257	-1.521	0.1352	1	-0.5653	-1.008	-0.1231	-2.574	0.01337	1
ZEB1		BRCA1met	-0.228	-0.8244	0.3683	-0.77	0.4453	1	-0.5415	-1.055	-0.0282	-2.124	0.03913	1
CDH5		BRCA1met	-0.2229	-0.76	0.3142	-0.8356	0.4078	1	-0.5404	-1.003	-0.0781	-2.354	0.02297	1
CLEC14A		BRCA1met	-0.1905	-0.6124	0.2315	-0.909	0.3681	1	-0.5293	-0.8925	-0.1662	-2.935	0.005217	1
SNAI1		BRCA1met	-0.4675	-0.9384	0.00335	-1.999	0.05158	1	-0.5237	-0.9289	-0.1184	-2.602	0.01248	1
SMAD5		BRCA1met	-0.4559	-0.9717	0.05984	-1.78	0.08177	1	-0.5101	-0.954	-0.06623	-2.314	0.02525	1
RPL23		BRCA1met	-0.3792	-0.8432	0.08469	-1.646	0.1067	1	-0.4981	-0.8974	-0.0988	-2.512	0.01563	1
TBX21		BRCA1met	-0.2589	-0.819	0.3013	-0.9307	0.357	1	-0.4948	-0.9769	-0.01271	-2.067	0.04449	1
TWF1		BRCA1met	-0.349	-0.7922	0.0943	-1.585	0.1198	1	-0.4633	-0.8448	-0.08182	-2.446	0.01841	1
DLL4		BRCA1met	-0.09356	-0.5637	0.3766	-0.4008	0.6905	1	-0.4472	-0.8518	-0.0426	-2.226	0.03105	1
IRF2		BRCA1met	-0.06073	-0.4073	0.2858	-0.3529	0.7258	1	-0.3171	-0.6154	-0.01888	-2.141	0.03767	1
VEGFB		BRCA1met	0.239	-0.1802	0.6582	1.148	0.257	1	0.416	0.05519	0.7768	2.322	0.0248	1
IKBKB		BRCA1met	0.1234	-0.2748	0.5215	0.624	0.5357	1	0.4815	0.1388	0.8242	2.83	0.00692	1
MGMT	X	BRCA1met	0.4388	-0.03327	0.9108	1.872	0.0677	1	0.595	0.1888	1.001	2.949	0.005023	0.9339
ICOSLG		BRCA1met	0.4597	-0.2045	1.124	1.394	0.1702	1	0.6146	0.04296	1.186	2.165	0.03569	1
FANCA	X	BRCA1met	0.5259	-0.1201	1.172	1.639	0.108	1	0.6261	0.0701	1.182	2.268	0.02817	1
BID		BRCA1met	0.4466	-0.1072	1	1.624	0.1113	1	0.6328	0.1562	1.109	2.673	0.0104	1
ANLN		BRCA1met	0.6162	-0.09102	1.323	1.755	0.0861	1	0.7081	0.09939	1.317	2.343	0.0236	1
EXO1		BRCA1met	0.5508	-0.2495	1.351	1.386	0.1726	1	0.7947	0.1059	1.483	2.323	0.0247	1
DTX4		BRCA1met	0.05235	-0.706	0.8107	0.139	0.8901	1	0.817	0.1643	1.47	2.52	0.01531	1
CXCL16		BRCA1met	0.5505	-0.08217	1.183	1.752	0.08651	1	0.855	0.3105	1.4	3.162	0.002795	1
CEP55		BRCA1met	0.7772	-0.1592	1.714	1.671	0.1015	1	0.9563	0.1503	1.762	2.389	0.02111	1
VTCN1		BRCA1met	1.29	-0.3693	2.95	1.566	0.1244	1	1.815	0.3861	3.243	2.558	0.01394	1
ARG2		BRCA1mut	-1.344	-2.53	-0.1578	-2.282	0.02726	1	-0.7796	-1.801	0.2414	-1.538	0.1311	1
IL1A		BRCA1mut	-1.311	-2.394	-0.2278	-2.437	0.01878	1	-0.7174	-1.649	0.2145	-1.55	0.1281	1
IL1R2		BRCA1mut	-1.136	-2.087	-0.1848	-2.405	0.02032	1	-0.6949	-1.514	0.1239	-1.709	0.09428	1
SERPINB5		BRCA1mut	-1.102	-2.103	-0.1014	-2.218	0.03162	1	-0.7796	-1.641	0.08151	-1.823	0.07489	1
WNT5B		BRCA1mut	-1.055	-1.801	-0.308	-2.844	0.006656	1	-0.552	-1.195	0.09063	-1.73	0.09049	0.5546
CCL18		BRCA1mut	-0.9632	-1.863	-0.06388	-2.157	0.03637	1	-0.7467	-1.521	0.02726	-1.943	0.05827	1
CCL13		BRCA1mut	-0.9366	-1.865	-0.007711	-2.03	0.04821	1	-0.2455	-1.045	0.554	-0.6182	0.5395	1
MAGEA4	X	BRCA1mut	-0.8871	-1.674	-0.1005	-2.271	0.02794	1	-0.5262	-1.203	0.1508	-1.565	0.1245	1
ARNT2		BRCA1mut	-0.821	-1.494	-0.1484	-2.458	0.01786	1	-0.3275	-0.9064	0.2515	-1.139	0.2607	1
FYN		BRCA1mut	-0.8066	-1.419	-0.1937	-2.65	0.01104	1	-0.3609	-0.8884	0.1666	-1.378	0.175	0.5957
PVR		BRCA1mut	-0.5571	-1.057	-0.05744	-2.245	0.02968	1	-0.3395	-0.7695	0.09052	-1.59	0.1188	1
ADORA2A		BRCA1mut	-0.5553	-1.068	-0.04283	-2.182	0.03433	1	-0.3613	-0.8024	0.07976	-1.65	0.1059	1
CASP9		BRCA1mut	-0.4812	-0.9503	-0.01209	-2.066	0.04461	1	-0.1496	-0.5534	0.2541	-0.7462	0.4594	1
DTX3L	X	BRCA1mut	0.5075	0.04852	0.9664	2.227	0.03099	1	0.3118	-0.08316	0.7068	1.59	0.1188	1
IFNAR1		BRCA1mut	0.5394	0.1528	0.926	2.809	0.007302	1	0.09553	-0.2372	0.4283	0.5781	0.566	1
SFXN1		BRCA1mut	0.5611	0.05391	1.068	2.228	0.0309	1	0.2606	-0.1758	0.6971	1.202	0.2354	1
H2AFX	X	BRCA1mut	0.5668	0.04145	1.092	2.173	0.03508	1	0.4322	-0.01994	0.8844	1.925	0.06053	1
ITGAV		BRCA1mut	0.573	0.05144	1.094	2.212	0.03202	1	-0.01533	-0.4642	0.4335	-0.06878	0.9455	1
PARP9	X	BRCA1mut	0.5733	0.07491	1.072	2.316	0.02512	1	0.3823	-0.04662	0.8113	1.795	0.07935	1
PIK3CA		BRCA1mut	0.5843	0.1287	1.04	2.582	0.01311	1	0.3366	-0.05555	0.7288	1.728	0.09071	1
RAD51	X	BRCA1mut	0.6283	0.09224	1.164	2.36	0.02263	1	0.3573	-0.104	0.8187	1.56	0.1258	1
ALDOA		BRCA1mut	0.6342	0.09146	1.177	2.353	0.02302	1	0.1829	-0.2842	0.65	0.7884	0.4345	1
MSH2	X	BRCA1mut	0.6451	0.1323	1.158	2.533	0.01483	1	0.4124	-0.02901	0.8537	1.881	0.06636	1
BRIP1	X	BRCA1mut	0.661	0.01373	1.308	2.056	0.04552	1	0.545	-0.01208	1.102	1.97	0.05496	1
IFIH1		BRCA1mut	0.674	0.04743	1.301	2.166	0.0356	1	0.5109	-0.02843	1.05	1.908	0.0628	1
PARP12	X	BRCA1mut	0.696	0.154	1.238	2.586	0.01299	1	0.432	-0.0345	0.8985	1.865	0.06869	1
TNFRSF11A		BRCA1mut	0.7028	0.1141	1.291	2.404	0.02036	1	-0.07146	-0.5781	0.4352	-0.284	0.7777	1
RIPK2		BRCA1mut	0.7413	0.2055	1.277	2.786	0.007761	1	0.1272	-0.3339	0.5884	0.5556	0.5812	1
A2M		BRCA1mut	0.7517	0.1746	1.329	2.623	0.01184	1	0.2759	-0.2209	0.7726	1.118	0.2693	1
MELK		BRCA1mut	0.755	0.06618	1.444	2.207	0.03241	1	0.4606	-0.1323	1.053	1.564	0.1247	1
TAP2		BRCA1mut	0.7733	0.09136	1.455	2.283	0.02714	1	0.4538	-0.1331	1.041	1.557	0.1264	1
HLA-DRA		BRCA1mut	0.7746	0.01397	1.535	2.051	0.0461	1	0.4292	-0.2254	1.084	1.32	0.1934	1
CSF1		BRCA1mut	0.7785	0.0511	1.506	2.155	0.0365	1	0.5734	-0.0527	1.199	1.844	0.0717	1
SAMSN1		BRCA1mut	0.8291	0.03673	1.621	2.107	0.04068	1	0.2071	-0.4748	0.889	0.6115	0.5439	1
SAMD9		BRCA1mut	0.8454	0.1225	1.568	2.355	0.02291	1	0.3916	-0.2305	1.014	1.268	0.2114	1
RRM2		BRCA1mut	0.846	0.1094	1.583	2.313	0.02533	1	0.5701	-0.06395	1.204	1.811	0.07683	1
TYMS	X	BRCA1mut	0.8746	0.03043	1.719	2.086	0.04261	1	0.5008	-0.2258	1.227	1.388	0.1719	1
TREM2		BRCA1mut	0.8835	0.09423	1.673	2.254	0.02907	1	0.286	-0.3933	0.9652	0.8478	0.401	1
CSF1R		BRCA1mut	0.9054	0.2259	1.585	2.683	0.01014	1	0.06955	-0.5153	0.6544	0.2395	0.8118	1
WDR76	X	BRCA1mut	0.9066	0.2947	1.518	2.983	0.004577	1	0.2431	-0.2836	0.7697	0.9294	0.3576	1
HLA-DPB1		BRCA1mut	0.9396	0.04725	1.832	2.12	0.03948	1	0.3421	-0.4259	1.11	0.8969	0.3745	1
IFI16		BRCA1mut	0.9536	0.2395	1.668	2.689	0.009995	1	0.4237	-0.1909	1.038	1.388	0.1719	1
BIRC5		BRCA1mut	0.9795	0.2009	1.758	2.533	0.01482	1	0.649	-0.02108	1.319	1.95	0.05733	0.01892
SLC11A1		BRCA1mut	1.009	0.2421	1.775	2.65	0.01105	1	0.4731	-0.1865	1.133	1.444	0.1555	0.6977
IL15		BRCA1mut	1.01	0.08753	1.932	2.205	0.03258	1	-0.08721	-0.8811	0.7066	-0.2212	0.8259	1
DEPTOR		BRCA1mut	1.036	0.1532	1.919	2.363	0.02247	1	-0.02625	-0.7863	0.7338	-0.06954	0.9449	1
IFIT3		BRCA1mut	1.036	0.2393	1.833	2.619	0.01196	1	0.628	-0.05762	1.314	1.844	0.07166	0.9673
MX1		BRCA1mut	1.037	0.1259	1.948	2.292	0.0266	1	0.7746	-0.009435	1.559	1.989	0.0527	1
C2		BRCA1mut	1.047	0.04664	2.048	2.108	0.04063	1	0.8268	-0.03449	1.688	1.933	0.05949	1
OLR1		BRCA1mut	1.062	0.2984	1.826	2.8	0.007477	1	0.2528	-0.4047	0.9103	0.7743	0.4428	1
CD48		BRCA1mut	1.064	0.1416	1.986	2.323	0.02473	1	0.6376	-0.1562	1.431	1.618	0.1127	1
IFIT2		BRCA1mut	1.085	0.3123	1.858	2.828	0.006956	1	0.6315	-0.03347	1.296	1.912	0.06216	1
SPP1		BRCA1mut	1.138	0.1017	2.174	2.211	0.0321	1	0.4204	-0.4713	1.312	0.9494	0.3475	1
IFIT1		BRCA1mut	1.164	0.1635	2.164	2.343	0.02359	1	0.74	-0.121	1.601	1.731	0.09031	1
CD47		BRCA1mut	1.185	0.4968	1.873	3.468	0.00116	0.9578	0.5791	-0.01302	1.171	1.969	0.05504	1
HLA-DRB1		BRCA1mut	1.205	0.07294	2.337	2.143	0.03748	1	0.5913	-0.383	1.566	1.222	0.228	1
CLEC5A		BRCA1mut	1.21	0.4073	2.013	3.035	0.003972	1	0.6273	-0.06362	1.318	1.828	0.07409	1
HLA-DQB1		BRCA1mut	2.651	0.1811	5.12	2.161	0.03598	1	2.048	-0.07711	4.174	1.941	0.05854	1
SH2D1A		ns	-0.01485	-0.9756	0.9459	-0.03112	0.9753	1	0.0005401	-0.8263	0.8274	0.001315	0.999	1
LY96		ns	0.345	-0.2849	0.9749	1.103	0.2759	1	0.002559	-0.5396	0.5447	0.009505	0.9925	1
JAK1		ns	-0.004067	-0.3787	0.3706	-0.02186	0.9827	1	0.007116	-0.3153	0.3295	0.04444	0.9647	1
MAP3K8		ns	-0.02978	-0.6856	0.626	-0.09146	0.9275	1	0.01039	-0.554	0.5748	0.03706	0.9706	1
RPTOR		ns	-0.0431	-0.4582	0.372	-0.2091	0.8353	1	0.01198	-0.3453	0.3692	0.06752	0.9465	1
ITGAM		ns	0.1653	-0.5261	0.8567	0.4814	0.6325	1	0.01521	-0.5799	0.6103	0.05145	0.9592	1
HAVCR2		ns	0.4943	-0.148	1.137	1.55	0.1282	1	0.01612	-0.5367	0.5689	0.05872	0.9534	0.2926
PIAS4	X	ns	-0.3296	-0.6789	0.01966	-1.9	0.06376	1	0.01922	-0.2814	0.3198	0.1287	0.8981	1
CD276		ns	-0.0631	-0.5985	0.4723	-0.2373	0.8135	1	0.02084	-0.44	0.4817	0.09106	0.9278	1
MAGEC1	X	ns	-0.6407	-1.679	0.3981	-1.242	0.2206	1	0.0237	-0.8703	0.9177	0.05339	0.9577	1
WNT2B		ns	-0.6629	-1.87	0.5442	-1.106	0.2746	1	0.02388	-1.015	1.063	0.04629	0.9633	1
RUNX3		ns	0.4295	-0.7165	1.576	0.7547	0.4543	1	0.02439	-0.9619	1.011	0.04979	0.9605	1
CXCR6		ns	0.2216	-0.8564	1.3	0.4139	0.6809	1	0.02766	-0.9002	0.9555	0.06002	0.9524	1
GLUD1		ns	0.1443	-0.341	0.6295	0.5986	0.5524	1	0.02811	-0.3895	0.4458	0.1355	0.8928	1
GOT1		ns	0.1931	-0.3427	0.7289	0.7259	0.4717	1	0.02935	-0.4318	0.4905	0.1282	0.8986	1
IL21R		ns	0.01243	-0.9507	0.9755	0.02598	0.9794	1	0.03322	-0.7957	0.8621	0.08071	0.936	1
HLA-E		ns	0.2048	-0.2899	0.6995	0.8336	0.4089	1	0.034	-0.3918	0.4598	0.1608	0.873	1
PIK3CG		ns	0.1192	-0.7208	0.9592	0.2857	0.7764	1	0.03737	-0.6856	0.7603	0.1041	0.9176	1
CASP3		ns	0.2451	-0.2045	0.6946	1.098	0.2781	1	0.03879	-0.3481	0.4257	0.2019	0.8409	1
TAF3		ns	-0.08307	-0.5543	0.3881	-0.355	0.7242	1	0.03903	-0.3665	0.4446	0.1938	0.8472	1
MTOR		ns	0.1379	-0.3781	0.654	0.5382	0.593	1	0.0405	-0.4036	0.4846	0.1836	0.8551	1
PSMB8		ns	0.2643	-0.3062	0.8348	0.9327	0.3559	1	0.04104	-0.45	0.532	0.1683	0.8671	1
PKM		ns	0.1361	-0.3071	0.5793	0.6183	0.5395	1	0.04143	-0.34	0.4229	0.2187	0.8279	1
CDH1		ns	-0.1669	-0.7465	0.4127	-0.5799	0.5648	1	0.04151	-0.4573	0.5404	0.1676	0.8677	1
TCF3		ns	-0.01794	-0.4255	0.3896	-0.08865	0.9297	1	0.04251	-0.3083	0.3933	0.244	0.8083	1
CD8A		ns	0.0341	-1.074	1.142	0.06197	0.9509	1	0.04343	-0.9104	0.9972	0.09169	0.9274	1
RIPK1		ns	0.1069	-0.2674	0.4812	0.5749	0.5682	1	0.04501	-0.2771	0.3672	0.2813	0.7797	1
FOXP3		ns	0.102	-0.7705	0.9745	0.2354	0.8149	1	0.05065	-0.7003	0.8016	0.1358	0.8926	1
ROCK1		ns	0.01522	-0.3946	0.425	0.0748	0.9407	1	0.05177	-0.3009	0.4045	0.2956	0.7689	1
RPL7A		ns	0.1426	-0.4754	0.7606	0.4645	0.6445	1	0.05437	-0.4775	0.5863	0.2058	0.8378	1
CD28		ns	0.1704	-0.6082	0.949	0.4407	0.6615	1	0.05652	-0.6136	0.7266	0.1698	0.8659	1
TAPBP		ns	0.3303	-0.2332	0.8939	1.18	0.244	1	0.05861	-0.4264	0.5436	0.2434	0.8088	1
ITPK1		ns	-0.3097	-0.8683	0.249	-1.116	0.2702	1	0.05972	-0.4211	0.5405	0.2501	0.8036	1
CD84		ns	0.3716	-0.3298	1.073	1.067	0.2917	1	0.06254	-0.5411	0.6662	0.2086	0.8357	1
NECTIN1		ns	-0.3214	-0.9753	0.3326	-0.9896	0.3276	1	0.0641	-0.4987	0.6269	0.2293	0.8196	1
LAMC2		ns	0.4965	-0.3853	1.378	1.134	0.2628	1	0.07132	-0.6876	0.8303	0.1892	0.8507	1
IRF8		ns	0.3658	-0.3188	1.05	1.076	0.2876	1	0.07192	-0.5172	0.6611	0.2458	0.8069	1
ANGPT2		ns	0.432	-0.217	1.081	1.34	0.1868	1	0.07318	-0.4854	0.6317	0.2638	0.7931	1
TYMP		ns	0.2869	-0.5041	1.078	0.7304	0.4689	1	0.07438	-0.6064	0.7552	0.22	0.8269	1
HLA-DOA		ns	0.2231	-0.507	0.9533	0.6154	0.5413	1	0.07468	-0.5537	0.7031	0.2393	0.8119	1
JAK3		ns	0.03318	-0.6498	0.7161	0.09784	0.9225	1	0.07477	-0.513	0.6626	0.2561	0.799	1
HDAC3	X	ns	0.1471	-0.2164	0.5106	0.8148	0.4194	1	0.07506	-0.2378	0.3879	0.4832	0.6313	1
ITGB2		ns	0.5011	-0.4213	1.424	1.094	0.2797	1	0.07727	-0.7166	0.8712	0.196	0.8455	0.6859
NFKBIA		ns	0.2956	-0.334	0.9253	0.9454	0.3495	1	0.0782	-0.4637	0.6201	0.2906	0.7727	1
NFATC2		ns	-0.1255	-0.6944	0.4433	-0.4445	0.6588	1	0.07869	-0.4109	0.5682	0.3237	0.7477	0.174
BBS1		ns	-0.08038	-0.5063	0.3456	-0.38	0.7057	1	0.08124	-0.2854	0.4479	0.4462	0.6575	1
NFKB2		ns	0.05482	-0.453	0.5626	0.2174	0.8289	1	0.08184	-0.3552	0.5189	0.3771	0.7079	1
GZMM		ns	-0.1388	-0.9802	0.7025	-0.3322	0.7413	1	0.08222	-0.6419	0.8063	0.2286	0.8202	1
IFITM1		ns	0.5048	-0.1446	1.154	1.565	0.1245	1	0.08473	-0.4742	0.6436	0.3053	0.7616	0.5894
CD3E		ns	0.202	-0.6316	1.036	0.488	0.6279	1	0.08508	-0.6324	0.8026	0.2388	0.8124	1
CSF2RB		ns	0.1605	-0.8393	1.16	0.3232	0.748	1	0.08895	-0.7715	0.9494	0.2082	0.836	1
RELN		ns	-0.04369	-1.475	1.388	-0.06147	0.9513	1	0.09186	-1.14	1.324	0.1501	0.8813	1
PSMB10		ns	0.1253	-0.4965	0.7472	0.4059	0.6868	1	0.09256	-0.4426	0.6278	0.3483	0.7292	1
LILRA5		ns	0.4298	-0.417	1.276	1.022	0.3122	1	0.09449	-0.6342	0.8232	0.2611	0.7952	1
TNFRSF1B		ns	0.5262	-0.08618	1.139	1.73	0.09038	1	0.09493	-0.4321	0.622	0.3627	0.7185	1
STAT2		ns	0.01482	-0.4047	0.4344	0.07112	0.9436	1	0.09563	-0.2655	0.4567	0.5333	0.5964	1
BAD		ns	-0.1734	-0.6061	0.2594	-0.8067	0.424	1	0.09657	-0.2758	0.469	0.5222	0.6041	0.9673
CD274		ns	-0.05266	-0.9784	0.8731	-0.1145	0.9093	1	0.09977	-0.697	0.8965	0.2522	0.8021	0.1281
CTSS		ns	0.5995	-0.1017	1.301	1.722	0.09197	1	0.1028	-0.5007	0.7063	0.3431	0.7331	0.9417
PDZK1IP1		ns	0.3929	-1.048	1.834	0.5491	0.5856	1	0.1044	-1.136	1.344	0.1695	0.8661	1
CD69		ns	0.3305	-0.3864	1.047	0.9282	0.3582	1	0.1045	-0.5125	0.7215	0.3412	0.7346	1
CD74		ns	0.4771	-0.3275	1.282	1.194	0.2387	1	0.1052	-0.5874	0.7977	0.3058	0.7612	1
ROBO4		ns	0.2279	-0.4335	0.8893	0.6938	0.4913	1	0.1052	-0.464	0.6745	0.3723	0.7114	0.8746
ITGA4		ns	0.2772	-0.4695	1.024	0.7476	0.4586	1	0.1157	-0.527	0.7584	0.3625	0.7187	1
IL2RB		ns	0.3963	-0.6657	1.458	0.7515	0.4563	1	0.1165	-0.7975	1.031	0.2567	0.7986	1
RICTOR		ns	0.3011	-0.09389	0.6961	1.535	0.1317	1	0.1174	-0.2225	0.4574	0.6956	0.4902	1
HCK		ns	0.2931	-0.4985	1.085	0.7456	0.4598	1	0.1188	-0.5626	0.8001	0.351	0.7272	1
CD27		ns	0.1839	-1.257	1.625	0.2569	0.7984	1	0.1214	-1.119	1.362	0.1971	0.8447	1
CD247		ns	0.3793	-0.2821	1.041	1.155	0.2542	1	0.1247	-0.4445	0.6939	0.4411	0.6612	1
BRD4	X	ns	-0.06706	-0.5108	0.3767	-0.3043	0.7623	1	0.1255	-0.2564	0.5074	0.6616	0.5116	1
PALMD		ns	0.002417	-0.7656	0.7705	0.006336	0.995	1	0.1259	-0.5351	0.7869	0.3836	0.7031	1
KDR		ns	0.5388	-0.04925	1.127	1.845	0.07157	1	0.1269	-0.3792	0.6331	0.505	0.616	1
NBN	X	ns	0.3035	-0.1347	0.7418	1.395	0.1699	1	0.1273	-0.2498	0.5045	0.6799	0.5	1
SMAP1		ns	-0.2766	-0.6591	0.1058	-1.456	0.1522	1	0.1284	-0.2007	0.4576	0.7857	0.4361	1
FCGR1A		ns	0.5184	-0.2136	1.25	1.426	0.1607	1	0.1284	-0.5016	0.7584	0.4105	0.6834	0.219
CD4		ns	0.4127	-0.2867	1.112	1.188	0.2409	1	0.1314	-0.4705	0.7334	0.4397	0.6622	1
APOE		ns	0.253	-0.5919	1.098	0.603	0.5495	1	0.1435	-0.5837	0.8708	0.3975	0.6929	1
PRR5		ns	-0.1883	-0.7729	0.3963	-0.6486	0.5199	1	0.1436	-0.3596	0.6468	0.5747	0.5683	1
FLNB		ns	-0.6463	-1.31	0.01726	-1.961	0.056	1	-0.4187	-0.9898	0.1523	-1.477	0.1467	1
C1QA		ns	0.4314	-0.3847	1.248	1.064	0.2928	1	0.145	-0.5574	0.8474	0.4156	0.6797	1
HLA-DMA		ns	0.745	-0.04945	1.54	1.888	0.06539	1	0.1479	-0.5359	0.8317	0.4357	0.6652	1
TNFSF13		ns	-0.5859	-1.193	0.02145	-1.943	0.05829	1	-0.4246	-0.9473	0.09807	-1.636	0.1088	1
ACVR1C		ns	-0.7009	-1.429	0.0267	-1.94	0.05864	1	-0.547	-1.173	0.07922	-1.759	0.08533	1
IL10RA		ns	0.5316	-0.305	1.368	1.28	0.2072	1	0.1492	-0.5709	0.8692	0.4171	0.6785	1
TMEM140		ns	0.2909	-0.4745	1.056	0.7653	0.4481	1	0.1492	-0.5095	0.8079	0.4561	0.6505	1
LAIR1		ns	0.3663	-0.3481	1.081	1.033	0.3073	1	0.1521	-0.4627	0.7669	0.4982	0.6208	1
HLA-F		ns	0.3021	-0.5353	1.139	0.7264	0.4713	1	0.1525	-0.5681	0.8732	0.4263	0.6719	1
FLT1		ns	0.6417	-0.063	1.346	1.834	0.07327	1	0.1529	-0.4536	0.7594	0.5076	0.6142	0.01101
HK1		ns	-0.5058	-1.057	0.04554	-1.847	0.07123	1	-0.1824	-0.6569	0.2921	-0.7739	0.443	1
MYD88		ns	0.1563	-0.2504	0.5629	0.7738	0.4431	1	0.1529	-0.1971	0.5029	0.8798	0.3836	1
SBNO2		ns	0.2971	-0.2617	0.8559	1.071	0.29	1	0.1568	-0.3241	0.6377	0.6567	0.5147	1
MFGE8		ns	0.4016	-0.7185	1.522	0.722	0.474	1	0.1584	-0.8056	1.122	0.3309	0.7423	1
IRF9		ns	0.242	-0.2097	0.6937	1.079	0.2864	1	0.1594	-0.2293	0.5482	0.8259	0.4132	1
MAGEC2	X	ns	-1.279	-2.689	0.1316	-1.826	0.07448	1	-1.135	-2.349	0.07848	-1.883	0.06606	1
C1QB		ns	0.4661	-0.3727	1.305	1.119	0.2691	1	0.1596	-0.5623	0.8815	0.4451	0.6583	1
ENO1		ns	0.4928	-0.04466	1.03	1.846	0.07138	1	0.1598	-0.3027	0.6223	0.6957	0.4902	1
PRKAA2		ns	-0.8624	-1.838	0.1127	-1.781	0.08161	1	-0.8322	-1.671	0.007059	-1.997	0.05188	1
TDO2		ns	1.057	-0.1388	2.253	1.78	0.0818	1	-0.3116	-1.341	0.7177	-0.6096	0.5452	1
PFKM		ns	-0.5127	-1.097	0.07162	-1.767	0.08398	1	-0.09921	-0.6021	0.4037	-0.3973	0.693	1
LY9		ns	-0.03298	-1.11	1.044	-0.06166	0.9511	1	0.1631	-0.7638	1.09	0.3544	0.7247	1
CYBB		ns	0.5485	-0.2887	1.386	1.319	0.1937	1	0.1682	-0.5523	0.8888	0.4701	0.6405	1
TNFRSF1A		ns	0.3699	-0.1127	0.8524	1.543	0.1297	1	0.1726	-0.2427	0.5879	0.8368	0.4071	1
TMEM173		ns	0.4663	-0.3422	1.275	1.161	0.2516	1	0.1726	-0.5233	0.8684	0.4994	0.6199	1
RORC		ns	-0.9498	-2.06	0.1604	-1.723	0.09174	1	-0.4556	-1.411	0.4999	-0.9602	0.342	1
HLA-C		ns	0.2702	-0.4888	1.029	0.7168	0.4772	1	0.1735	-0.4797	0.8267	0.5347	0.5954	1
XCL1/2		ns	0.1984	-0.7713	1.168	0.4121	0.6822	1	0.1754	-0.6591	1.01	0.4233	0.6741	1
NOTCH1		ns	-0.1094	-0.6969	0.4782	-0.3748	0.7096	1	0.1762	-0.3295	0.6819	0.7015	0.4866	1
CASP1		ns	0.5437	-0.09722	1.185	1.708	0.09443	1	-0.01397	-0.5656	0.5377	-0.05099	0.9596	1
NOD2		ns	0.1427	-0.3787	0.664	0.551	0.5843	1	0.1765	-0.2722	0.6252	0.7919	0.4325	1
FCGR2B		ns	0.6219	-0.3584	1.602	1.277	0.2079	1	0.1786	-0.6651	1.022	0.4264	0.6719	1
COL4A5		ns	-0.7246	-1.585	0.1356	-1.696	0.0967	1	-0.597	-1.337	0.1433	-1.624	0.1113	1
CD8B		ns	-1.255	-2.745	0.2351	-1.696	0.09675	1	-0.8292	-2.112	0.4534	-1.302	0.1995	1
FPR3		ns	0.7285	-0.1321	1.589	1.705	0.0951	1	0.1818	-0.5588	0.9225	0.4944	0.6234	1
CXCL5		ns	-1.041	-2.285	0.2031	-1.685	0.09887	1	-0.9009	-1.972	0.1697	-1.695	0.09703	1
CDKN2A		ns	0.8832	-0.1774	1.944	1.677	0.1004	1	-0.4679	-1.381	0.4449	-1.032	0.3075	1
TGFBR2		ns	0.432	-0.08759	0.9516	1.674	0.101	1	-0.2569	-0.7041	0.1903	-1.157	0.2534	1
ELOB		ns	0.4017	-0.1082	0.9115	1.586	0.1196	1	0.1841	-0.2547	0.6229	0.8448	0.4027	1
FGFR1		ns	-0.5489	-1.225	0.1273	-1.635	0.109	1	-0.5073	-1.089	0.07474	-1.755	0.086	0.6859
CNTFR		ns	-0.859	-1.919	0.201	-1.632	0.1097	1	-0.5707	-1.483	0.3417	-1.259	0.2143	1
CCL4		ns	0.3249	-0.5626	1.213	0.7372	0.4648	1	0.1871	-0.5768	0.951	0.4932	0.6242	1
HERC6		ns	0.07106	-0.5439	0.686	0.2327	0.817	1	0.1879	-0.3413	0.7172	0.715	0.4783	1
TLR3		ns	0.479	-0.1252	1.083	1.596	0.1173	1	-0.03556	-0.5555	0.4844	-0.1377	0.8911	0.5894
APC		ns	-0.3063	-0.6945	0.08197	-1.589	0.1191	1	-0.3305	-0.6647	0.003635	-1.992	0.05244	1
TNFRSF14		ns	0.6095	-0.1351	1.354	1.648	0.1062	1	0.1918	-0.4491	0.8327	0.6027	0.5497	1
ANGPTL4		ns	-0.5741	-1.305	0.1565	-1.582	0.1205	1	-0.3429	-0.9717	0.2859	-1.098	0.2779	0.8746
LAMA1		ns	-0.9062	-2.069	0.2564	-1.57	0.1235	1	-0.8602	-1.861	0.1404	-1.731	0.09022	1
CASP8		ns	0.3098	-0.05343	0.673	1.717	0.09271	1	0.1942	-0.1185	0.5068	1.251	0.2175	1
CHUK		ns	-0.421	-0.9632	0.1213	-1.563	0.1249	1	-0.4058	-0.8725	0.06084	-1.751	0.08668	1
CST2		ns	-1.184	-2.715	0.3477	-1.557	0.1265	1	-0.5461	-1.864	0.772	-0.8343	0.4085	0.174
HLA-DPA1		ns	0.6584	-0.2098	1.527	1.527	0.1337	1	0.195	-0.5522	0.9422	0.5254	0.6018	1
EIF2B4		ns	0.03646	-0.3398	0.4128	0.1951	0.8462	1	0.1971	-0.1268	0.5209	1.225	0.2268	1
KIR2DL3		ns	-0.5862	-1.352	0.1797	-1.541	0.1302	1	-0.5687	-1.228	0.09056	-1.737	0.08916	1
GBP2		ns	0.4957	-0.3874	1.379	1.13	0.2643	1	0.1997	-0.5604	0.9598	0.5291	0.5993	1
IRF5		ns	-0.02931	-0.6864	0.6278	-0.08982	0.9288	1	0.1998	-0.3658	0.7653	0.7113	0.4806	1
API5		ns	0.2473	-0.1081	0.6028	1.401	0.168	1	0.2027	-0.1033	0.5086	1.334	0.1889	1
WNT2		ns	0.003547	-1.001	1.008	0.007109	0.9944	1	0.2038	-0.6609	1.068	0.4745	0.6374	1
NECTIN2		ns	0.0545	-0.4301	0.5391	0.2265	0.8219	1	0.2039	-0.2132	0.6209	0.9843	0.3302	1
BTLA		ns	0.04682	-0.8299	0.9235	0.1075	0.9148	1	0.2047	-0.5498	0.9593	0.5464	0.5875	1
CLECL1		ns	0.5137	-0.2267	1.254	1.397	0.1692	1	0.2054	-0.4318	0.8425	0.649	0.5196	1
EOMES		ns	0.08886	-0.6219	0.7996	0.2517	0.8024	1	0.2061	-0.4056	0.8178	0.6785	0.5009	1
MAML2		ns	0.4848	-0.05636	1.026	1.804	0.07788	1	0.2064	-0.2594	0.6721	0.8923	0.3769	1
GAS1		ns	0.7612	-0.2609	1.783	1.5	0.1406	1	-0.0765	-0.9562	0.8032	-0.1751	0.8618	0.4265
GNLY		ns	0.9167	-0.3263	2.16	1.485	0.1445	1	-0.3148	-1.385	0.7551	-0.5925	0.5564	1
ITGAE		ns	-0.2755	-0.6514	0.1005	-1.475	0.147	1	-0.1872	-0.5108	0.1364	-1.165	0.2501	1
COL11A2		ns	-0.5037	-1.195	0.188	-1.466	0.1494	1	-0.4399	-1.035	0.1554	-1.488	0.1436	1
CD209		ns	-0.5954	-1.416	0.2256	-1.46	0.1511	1	-0.62	-1.326	0.08656	-1.767	0.08396	1
CXCR4		ns	0.0644	-0.6001	0.7289	0.1952	0.8461	1	0.2074	-0.3645	0.7793	0.7302	0.469	1
RAD51C	X	ns	-0.2921	-0.6996	0.1155	-1.443	0.1559	1	-0.2088	-0.5596	0.142	-1.199	0.2369	1
LDHA		ns	0.3745	-0.1482	0.8971	1.443	0.156	1	-0.1397	-0.5896	0.3101	-0.6255	0.5348	1
PTGER4		ns	0.2159	-0.5367	0.9685	0.5777	0.5663	1	0.2097	-0.438	0.8574	0.6519	0.5178	1
PLOD2		ns	0.5737	-0.2298	1.377	1.438	0.1574	1	-0.2091	-0.9006	0.4824	-0.6088	0.5457	1
IL34		ns	0.03577	-0.7633	0.8348	0.09014	0.9286	1	0.2119	-0.4758	0.8997	0.6206	0.538	1
FCGR2A		ns	0.4803	-0.1972	1.158	1.428	0.1602	1	-0.06435	-0.6475	0.5187	-0.2222	0.8251	1
MAP3K7		ns	-0.2846	-0.6145	0.04525	-1.737	0.0891	1	0.212	-0.07193	0.4959	1.503	0.1397	1
KIR3DL1		ns	-0.5981	-1.45	0.2539	-1.414	0.1643	1	-0.664	-1.397	0.06935	-1.823	0.07486	1
IL2RG		ns	0.4086	-0.5959	1.413	0.8192	0.417	1	0.2121	-0.6524	1.077	0.494	0.6237	1
TTC30A		ns	0.3298	-0.3652	1.025	0.9557	0.3443	1	0.2133	-0.3848	0.8115	0.7182	0.4763	1
GIMAP4		ns	0.4492	-0.2142	1.113	1.364	0.1795	1	0.2144	-0.3566	0.7853	0.7561	0.4535	1
GZMK		ns	0.3836	-0.6546	1.422	0.744	0.4607	1	0.2154	-0.6782	1.109	0.4854	0.6297	1
PTPRC		ns	0.5487	-0.2467	1.344	1.389	0.1716	1	-0.02151	-0.7061	0.6631	-0.06327	0.9498	1
CTSW		ns	0.3689	-0.755	1.493	0.661	0.512	1	0.2178	-0.7495	1.185	0.4534	0.6524	1
MAGEA3/A6	X	ns	-0.8843	-2.17	0.4019	-1.384	0.173	1	-0.2343	-1.341	0.8726	-0.4263	0.6719	1
ITGAL		ns	0.1989	-0.7622	1.16	0.4167	0.6789	1	0.2223	-0.6049	1.049	0.5412	0.591	1
PVRIG		ns	-0.3892	-0.9598	0.1814	-1.374	0.1763	1	-0.3001	-0.7911	0.191	-1.23	0.2249	1
ITGAX		ns	0.589	-0.1922	1.37	1.518	0.1359	1	0.2226	-0.4498	0.8949	0.6666	0.5084	1
APOL6		ns	0.3776	-0.4187	1.174	0.9549	0.3447	1	0.2228	-0.4625	0.9081	0.6547	0.516	1
WNT5A		ns	-0.6597	-1.637	0.3176	-1.359	0.1808	1	-0.6449	-1.486	0.1962	-1.544	0.1295	1
ZC3H12A		ns	-0.4166	-1.036	0.2024	-1.355	0.1821	1	-0.2865	-0.8192	0.2462	-1.083	0.2845	0.6977
NEIL1	X	ns	-0.5496	-1.367	0.2675	-1.354	0.1823	1	-0.4718	-1.175	0.2314	-1.351	0.1834	1
IL17A		ns	-0.6781	-1.687	0.3311	-1.353	0.1828	1	-0.6027	-1.471	0.266	-1.397	0.1692	1
HSD11B1		ns	-0.04754	-1.259	1.164	-0.07902	0.9374	1	0.2281	-0.8146	1.271	0.4404	0.6617	1
HES1		ns	-0.4952	-1.24	0.2494	-1.339	0.1872	1	-0.282	-0.9229	0.3588	-0.8862	0.3802	1
ATM	X	ns	0.1404	-0.2266	0.5074	0.7706	0.4449	1	0.2302	-0.08564	0.5461	1.468	0.1491	1
MSH6	X	ns	0.327	-0.1114	0.7654	1.502	0.1401	1	0.2305	-0.1468	0.6078	1.23	0.225	1
AXIN1		ns	-0.1051	-0.5319	0.3218	-0.4957	0.6225	1	0.233	-0.1344	0.6004	1.277	0.208	1
ITGB3		ns	-0.7808	-1.979	0.4172	-1.312	0.196	1	-0.929	-1.96	0.1022	-1.814	0.07627	1
NFKBIE		ns	0.2332	-0.307	0.7734	0.8694	0.3892	1	0.2338	-0.2311	0.6987	1.013	0.3165	1
PDGFB		ns	-0.3688	-0.9396	0.202	-1.301	0.1998	1	-0.2788	-0.7701	0.2125	-1.143	0.2591	1
SIRPB2		ns	0.4399	-0.2445	1.124	1.294	0.2022	1	-0.09976	-0.6888	0.4893	-0.341	0.7347	1
FAM30A		ns	-0.3672	-1.855	1.12	-0.4971	0.6215	1	0.2345	-1.046	1.515	0.3688	0.714	1
SOCS1		ns	-0.4907	-1.262	0.281	-1.281	0.2069	1	-0.2002	-0.8644	0.4639	-0.6071	0.5468	0.9339
CXCL13		ns	-0.4445	-2.033	1.144	-0.5635	0.5759	1	0.2359	-1.131	1.603	0.3474	0.7299	1
CCR5		ns	0.448	-0.4315	1.328	1.026	0.3104	1	0.2366	-0.5204	0.9935	0.6294	0.5322	0.6977
BNIP3	X	ns	-0.3017	-0.7782	0.1748	-1.275	0.2088	1	-0.1092	-0.5192	0.3009	-0.536	0.5946	1
BRD3	X	ns	0.1546	-0.2423	0.5514	0.7844	0.4369	1	0.2389	-0.1027	0.5805	1.408	0.1658	1
IL2		ns	-0.4529	-1.179	0.2729	-1.257	0.2153	1	-0.5906	-1.215	0.03405	-1.904	0.06328	1
RELA		ns	0.2381	-0.07746	0.5537	1.519	0.1356	1	0.2458	-0.02578	0.5174	1.823	0.07497	1
GLS		ns	-0.4558	-1.192	0.2798	-1.248	0.2185	1	-0.1489	-0.7821	0.4842	-0.4736	0.638	1
TAPBPL		ns	0.1598	-0.5587	0.8784	0.448	0.6563	1	0.2482	-0.3702	0.8666	0.8082	0.4232	1
IFNG		ns	-0.393	-1.034	0.2477	-1.235	0.2231	1	-0.03777	-0.5892	0.5137	-0.1379	0.8909	1
CD68		ns	0.5904	-0.1156	1.296	1.684	0.09906	1	0.2513	-0.3563	0.859	0.8329	0.4093	1
ARG1		ns	-0.6335	-1.675	0.4082	-1.225	0.2271	1	-0.5884	-1.485	0.3082	-1.321	0.193	1
AXL		ns	0.3931	-0.2538	1.04	1.224	0.2274	1	-0.1158	-0.6726	0.441	-0.4188	0.6774	1
TCL1A		ns	0.4633	-0.2824	1.209	1.251	0.2173	1	0.256	-0.3858	0.8978	0.8033	0.426	1
FCGR3A/B		ns	0.6093	-0.331	1.55	1.305	0.1985	1	0.2587	-0.5506	1.068	0.6437	0.523	1
RASAL1		ns	-0.4282	-1.145	0.2886	-1.203	0.2353	1	-0.05617	-0.6732	0.5608	-0.1833	0.8554	1
CD58		ns	-0.3342	-0.8973	0.2288	-1.195	0.2381	1	-0.2156	-0.7002	0.269	-0.8959	0.375	1
TRAF1		ns	0.008557	-0.6145	0.6316	0.02766	0.9781	1	0.2591	-0.2772	0.7953	0.9728	0.3358	1
CCND2		ns	-0.4964	-1.335	0.3426	-1.191	0.2397	1	-0.6258	-1.348	0.09635	-1.745	0.08776	1
MFNG		ns	-0.4053	-1.091	0.2805	-1.19	0.2402	1	-0.1363	-0.7266	0.4539	-0.4651	0.6441	1
MICB		ns	0.5819	-0.3493	1.513	1.258	0.2147	1	0.26	-0.5413	1.061	0.6535	0.5168	1
GZMA		ns	0.7017	-0.4884	1.892	1.187	0.2413	1	-0.1149	-1.139	0.9094	-0.2258	0.8224	1
CMKLR1		ns	-0.4237	-1.145	0.2981	-1.182	0.2433	1	-0.4884	-1.11	0.1327	-1.583	0.1203	1
CLEC7A		ns	0.862	-0.01478	1.739	1.98	0.05382	1	0.2635	-0.4911	1.018	0.7031	0.4856	1
OAS1		ns	0.2068	-0.67	1.084	0.475	0.6371	1	0.2678	-0.4869	1.022	0.7145	0.4786	1
CD163		ns	0.4067	-0.2902	1.104	1.175	0.2461	1	-0.08068	-0.6805	0.5191	-0.2709	0.7877	1
COL11A1		ns	0.8457	-0.6078	2.299	1.172	0.2474	1	-0.9156	-2.167	0.3354	-1.474	0.1474	1
EPM2AIP1	X	ns	0.1169	-0.3802	0.6141	0.4737	0.638	1	0.27	-0.1578	0.6979	1.271	0.2103	1
POLD1	X	ns	0.08741	-0.4111	0.5859	0.3531	0.7257	1	0.2712	-0.1579	0.7002	1.273	0.2096	1
TLR1		ns	0.3935	-0.2925	1.08	1.155	0.2541	1	-0.07423	-0.6646	0.5162	-0.2532	0.8013	1
TNFRSF25		ns	0.007785	-0.528	0.5436	0.02926	0.9768	1	0.2721	-0.1891	0.7332	1.188	0.241	1
VCAM1		ns	0.5094	-0.3824	1.401	1.15	0.2561	1	-0.1611	-0.9287	0.6064	-0.4228	0.6744	1
CD80		ns	0.4423	-0.3601	1.245	1.11	0.2728	1	0.275	-0.4156	0.9656	0.8019	0.4268	1
EDN1		ns	0.5199	-0.3942	1.434	1.145	0.2581	1	-0.02756	-0.8143	0.7592	-0.07054	0.9441	1
NCAM1		ns	-0.5684	-1.57	0.4329	-1.143	0.259	1	-0.4045	-1.266	0.4573	-0.9452	0.3496	1
WNT3A		ns	-0.4673	-1.291	0.3561	-1.143	0.2591	1	-0.2235	-0.9322	0.4852	-0.6351	0.5285	1
DPP4		ns	-0.7146	-1.982	0.5528	-1.135	0.2622	1	-0.8916	-1.982	0.1992	-1.646	0.1067	1
NDUFA4L2		ns	-0.2363	-1.151	0.6786	-0.52	0.6056	1	0.2789	-0.5086	1.066	0.7131	0.4794	1
PSMB9		ns	0.4242	-0.4651	1.314	0.9605	0.3419	1	0.2792	-0.4862	1.045	0.7345	0.4664	1
EIF4EBP1		ns	0.3441	-0.1548	0.843	1.389	0.1717	1	0.2793	-0.1501	0.7087	1.31	0.1968	1
GPSM3		ns	0.5392	-0.1695	1.248	1.532	0.1325	1	0.2801	-0.3298	0.89	0.9247	0.36	1
SGK1		ns	-0.4419	-1.241	0.3567	-1.114	0.2711	1	-0.6745	-1.362	0.01281	-1.976	0.05424	1
AKT1		ns	0.2057	-0.3594	0.7709	0.733	0.4673	1	0.2845	-0.2019	0.7709	1.178	0.245	1
CXCL3		ns	-0.6312	-1.783	0.5203	-1.104	0.2755	1	-0.2765	-1.268	0.7146	-0.5618	0.577	0.9793
SREBF1	X	ns	0.2623	-0.3706	0.8952	0.8347	0.4083	1	0.2879	-0.2568	0.8326	1.064	0.2928	1
NLRC5		ns	0.2295	-0.4478	0.9068	0.6823	0.4985	1	0.2902	-0.2927	0.8731	1.003	0.3214	0.6859
MMRN2		ns	0.2399	-0.5344	1.014	0.6239	0.5358	1	0.2938	-0.3726	0.9602	0.8878	0.3794	1
LAMB3		ns	0.1502	-0.9417	1.242	0.277	0.783	1	0.2965	-0.6432	1.236	0.6354	0.5284	1
ANGPT1		ns	-0.4829	-1.369	0.4033	-1.097	0.2783	1	-0.7411	-1.504	0.02163	-1.957	0.05657	1
CCNE1		ns	0.2016	-0.7395	1.143	0.4314	0.6682	1	0.2968	-0.5132	1.107	0.7379	0.4644	1
TNFSF10	X	ns	0.8029	-0.07724	1.683	1.837	0.07277	1	0.2982	-0.4594	1.056	0.7926	0.4322	1
GOT2		ns	-0.2679	-0.7664	0.2306	-1.082	0.2849	1	-0.1427	-0.5717	0.2863	-0.6699	0.5063	1
ARID1A	X	ns	0.1914	-0.165	0.5478	1.081	0.2852	1	-0.02593	-0.3327	0.2808	-0.1702	0.8656	1
PRLR		ns	-0.4773	-1.367	0.4125	-1.08	0.2858	1	-0.6489	-1.415	0.1168	-1.706	0.09477	1
CEBPB		ns	0.5403	-0.00907	1.09	1.98	0.05374	1	0.2986	-0.1742	0.7715	1.272	0.2099	1
CD300A		ns	0.6292	-0.1224	1.381	1.686	0.09871	1	0.3003	-0.3466	0.9471	0.9347	0.3549	1
THY1		ns	0.4419	-0.5982	1.482	0.8556	0.3967	1	0.3004	-0.5947	1.196	0.6758	0.5026	1
NID2		ns	-0.4747	-1.367	0.4179	-1.071	0.2899	1	-0.695	-1.463	0.07314	-1.822	0.07506	1
TPI1		ns	0.3568	-0.08604	0.7995	1.622	0.1117	1	0.3035	-0.0776	0.6846	1.604	0.1157	1
IFI6		ns	0.7678	-0.3495	1.885	1.384	0.1732	1	0.3078	-0.6538	1.269	0.6446	0.5224	1
S100A9		ns	1.224	-0.5859	3.034	1.362	0.18	1	0.3095	-1.248	1.867	0.4001	0.6909	1
ERO1A		ns	0.3637	-0.2627	0.99	1.169	0.2485	1	0.3117	-0.2274	0.8508	1.164	0.2503	1
FCGRT		ns	-0.226	-0.657	0.205	-1.056	0.2965	1	-0.225	-0.596	0.1459	-1.222	0.2282	1
PDCD1		ns	-0.4097	-1.208	0.3889	-1.033	0.3071	1	-0.3188	-1.006	0.3685	-0.934	0.3553	1
LTB		ns	0.3743	-0.932	1.681	0.577	0.5668	1	0.3121	-0.8121	1.436	0.5591	0.5789	1
CCNB1		ns	0.3459	-0.3629	1.055	0.9827	0.331	1	0.3127	-0.2974	0.9227	1.032	0.3075	1
ADAM12		ns	0.5428	-0.5189	1.605	1.03	0.3087	1	-0.4784	-1.392	0.4354	-1.054	0.2973	1
LILRB4		ns	0.4709	-0.4009	1.343	1.088	0.2825	1	0.3162	-0.4342	1.067	0.8485	0.4006	1
MXI1		ns	0.3143	-0.3037	0.9324	1.024	0.3112	1	-0.04948	-0.5814	0.4825	-0.1873	0.8523	0.8746
CBLC		ns	0.3702	-0.2395	0.98	1.223	0.2278	1	0.3194	-0.2054	0.8442	1.226	0.2267	1
VHL		ns	0.1432	-0.2354	0.5218	0.7615	0.4503	1	0.3257	-0.000112	0.6516	2.013	0.05008	1
FGF13		ns	-0.4869	-1.468	0.4945	-0.999	0.3231	1	-0.7039	-1.549	0.1408	-1.678	0.1002	1
CCL19		ns	0.7728	-0.3464	1.892	1.39	0.1712	1	0.3277	-0.6356	1.291	0.6851	0.4968	1
IL12RB2		ns	-0.5103	-1.555	0.5346	-0.9834	0.3306	1	-0.3992	-1.298	0.5001	-0.8939	0.3761	1
CD86		ns	0.7582	-0.04994	1.566	1.889	0.06526	1	0.3349	-0.3607	1.03	0.9694	0.3375	1
HDAC5	X	ns	-0.2086	-0.6388	0.2216	-0.9764	0.334	1	-0.0377	-0.4079	0.3325	-0.2051	0.8384	1
NKG7		ns	0.5481	-0.5888	1.685	0.9708	0.3368	1	-0.0595	-1.038	0.9189	-0.1225	0.9031	1
TNFSF8		ns	-0.5778	-1.777	0.6212	-0.9703	0.337	1	-0.5382	-1.57	0.4937	-1.05	0.2992	1
TBXAS1		ns	0.3517	-0.3817	1.085	0.9656	0.3394	1	-0.04887	-0.6801	0.5823	-0.1559	0.8768	1
TAP1		ns	0.4101	-0.3689	1.189	1.06	0.2947	1	0.3384	-0.3321	1.009	1.016	0.3149	1
FADD		ns	0.2953	-0.118	0.7086	1.439	0.1571	1	0.3385	-0.01719	0.6942	1.916	0.06163	1
TLR5		ns	0.4779	-0.372	1.328	1.132	0.2635	1	0.339	-0.3925	1.071	0.9333	0.3556	1
HLA-DMB		ns	0.3681	-0.4102	1.146	0.9524	0.346	1	-0.01674	-0.6866	0.6531	-0.05033	0.9601	1
IKBKG		ns	-0.2041	-0.626	0.2179	-0.974	0.3352	1	0.3431	-0.02004	0.7063	1.903	0.06346	1
CDK6		ns	-0.3525	-1.109	0.4036	-0.9388	0.3528	1	-0.03481	-0.6855	0.6159	-0.1077	0.9147	1
THBS1		ns	0.4404	-0.5091	1.39	0.934	0.3552	1	-0.1904	-1.008	0.6268	-0.4693	0.6411	1
IFITM2		ns	0.3841	-0.4447	1.213	0.9333	0.3556	1	-0.141	-0.8543	0.5724	-0.3979	0.6925	1
IL1B		ns	0.467	-0.4515	1.386	1.024	0.3114	1	0.344	-0.4465	1.135	0.8763	0.3855	0.9339
IL16		ns	0.2948	-0.4895	1.079	0.7569	0.453	1	0.3481	-0.3269	1.023	1.038	0.3046	1
APH1B		ns	-0.2677	-0.8484	0.3131	-0.9281	0.3583	1	-0.3056	-0.8055	0.1942	-1.231	0.2245	1
IRF3		ns	-0.2181	-0.6925	0.2563	-0.9259	0.3594	1	-0.2012	-0.6095	0.2071	-0.9925	0.3262	1
MAGEA12	X	ns	-0.4499	-1.433	0.5335	-0.9213	0.3618	1	-0.3716	-1.218	0.4749	-0.884	0.3814	1
HK2		ns	-0.2609	-0.8316	0.3098	-0.9206	0.3621	1	-0.07786	-0.569	0.4133	-0.3192	0.751	1
TP53	X	ns	-0.3446	-1.102	0.4125	-0.9165	0.3642	1	-0.02662	-0.6782	0.625	-0.08225	0.9348	1
HDC		ns	-0.4094	-1.313	0.4945	-0.912	0.3666	1	-0.2099	-0.9878	0.5681	-0.5432	0.5897	1
FPR1		ns	0.4895	-0.5998	1.579	0.9049	0.3703	1	-0.4103	-1.348	0.5272	-0.8814	0.3828	1
KLRK1		ns	0.4394	-0.5442	1.423	0.8996	0.3731	1	-0.04864	-0.8952	0.7979	-0.1157	0.9084	1
STAT1		ns	0.278	-0.4928	1.049	0.7263	0.4714	1	0.3514	-0.312	1.015	1.067	0.2918	1
LOXL2		ns	-0.2549	-0.8288	0.3189	-0.8946	0.3757	1	-0.3544	-0.8482	0.1395	-1.445	0.1554	1
SFRP4		ns	0.5592	-0.7184	1.837	0.8814	0.3828	1	-0.3569	-1.456	0.7426	-0.6536	0.5166	1
UBA7	X	ns	0.2284	-0.2956	0.7525	0.8778	0.3847	1	-0.04589	-0.4969	0.4051	-0.2049	0.8386	1
CCL21		ns	0.4857	-0.6325	1.604	0.8746	0.3864	1	-0.9368	-1.899	0.02558	-1.96	0.05614	1
HRAS		ns	-0.2068	-0.6854	0.2718	-0.8701	0.3888	1	-0.1301	-0.5421	0.2818	-0.6363	0.5278	1
IFI27		ns	0.3668	-0.5662	1.3	0.7916	0.4327	1	0.3521	-0.4509	1.155	0.883	0.3819	1
CD70		ns	-0.3866	-1.293	0.5202	-0.8585	0.3951	1	-0.5165	-1.297	0.264	-1.333	0.1893	1
NRAS		ns	0.249	-0.219	0.717	1.071	0.2897	1	0.3532	-0.04959	0.7561	1.766	0.08417	1
KRAS		ns	-0.1869	-0.6289	0.2552	-0.8511	0.3992	1	-0.0431	-0.4236	0.3374	-0.2281	0.8206	1
JAK2		ns	-0.23	-0.7759	0.3158	-0.8486	0.4005	1	-0.05676	-0.5266	0.413	-0.2433	0.8089	1
NF1		ns	-0.1619	-0.5467	0.2228	-0.8476	0.4011	1	-0.07949	-0.4106	0.2516	-0.4834	0.6311	1
DUSP2		ns	-0.3761	-1.271	0.5192	-0.846	0.402	1	-0.03858	-0.8091	0.732	-0.1008	0.9201	1
CLEC4E		ns	-0.3834	-1.297	0.5303	-0.845	0.4026	1	-0.609	-1.395	0.1774	-1.559	0.1259	1
TNFSF13B		ns	0.236	-0.3276	0.7996	0.8433	0.4035	1	-0.002231	-0.4873	0.4828	-0.009262	0.9927	1
ALDOC		ns	-0.1286	-0.9022	0.6449	-0.3349	0.7392	1	0.363	-0.3028	1.029	1.098	0.278	1
ID4		ns	0.4695	-0.6625	1.602	0.8352	0.408	1	-0.2895	-1.264	0.6848	-0.5983	0.5526	1
CCNO	X	ns	0.03433	-1.012	1.081	0.06605	0.9476	1	0.3662	-0.5347	1.267	0.8186	0.4173	1
PCK2		ns	0.2579	-0.2299	0.7456	1.065	0.2927	1	0.3762	-0.04357	0.796	1.805	0.07777	1
SYK		ns	-0.1157	-0.8568	0.6254	-0.3144	0.7546	1	0.3792	-0.2586	1.017	1.197	0.2375	1
TNFSF4		ns	-0.2721	-0.9386	0.3944	-0.8222	0.4153	1	-0.2984	-0.8721	0.2752	-1.048	0.3003	1
IRF1		ns	0.5983	-0.1021	1.299	1.72	0.09224	1	0.3802	-0.2226	0.983	1.27	0.2106	0.5957
IL24		ns	-0.3024	-1.047	0.4426	-0.8174	0.418	1	-0.4694	-1.111	0.1718	-1.474	0.1474	1
GLUL		ns	0.172	-0.254	0.5979	0.813	0.4204	1	-0.1885	-0.5551	0.1781	-1.035	0.3061	0.9417
RELB		ns	0.4728	-0.1185	1.064	1.61	0.1143	1	0.3842	-0.1248	0.8931	1.52	0.1354	1
PIK3R2		ns	0.1364	-0.3856	0.6584	0.5261	0.6014	1	0.3851	-0.06417	0.8344	1.726	0.09115	1
SLC16A1		ns	0.3294	-0.4473	1.106	0.8539	0.3976	1	0.3862	-0.2823	1.055	1.163	0.2508	1
ADM		ns	-0.3146	-1.127	0.4981	-0.7795	0.4397	1	-0.5575	-1.257	0.1419	-1.605	0.1154	1
CCND1	X	ns	-0.4811	-1.724	0.7615	-0.7796	0.4397	1	-0.255	-1.324	0.8144	-0.4802	0.6334	1
PRKACB		ns	-0.244	-0.8749	0.3868	-0.7789	0.4401	1	-0.3303	-0.8732	0.2127	-1.225	0.2269	1
TNFAIP6		ns	0.4138	-0.6564	1.484	0.7786	0.4403	1	-0.418	-1.339	0.5031	-0.9139	0.3656	1
CD19		ns	-0.3484	-1.255	0.558	-0.7739	0.443	1	-0.03094	-0.811	0.7492	-0.07985	0.9367	1
SLC2A1		ns	0.1279	-0.3898	0.6456	0.4974	0.6213	1	0.3923	-0.0533	0.8379	1.773	0.08297	1
IL2RA		ns	-0.389	-1.402	0.6236	-0.7736	0.4432	1	-0.8484	-1.72	0.02306	-1.96	0.05611	1
CXCL8		ns	0.2509	-1.244	1.746	0.3378	0.7371	1	0.3952	-0.8918	1.682	0.6183	0.5395	1
SHC2		ns	-0.3686	-1.334	0.5969	-0.7688	0.446	1	-0.5659	-1.397	0.2651	-1.371	0.177	1
TNFSF12		ns	-0.2002	-0.7256	0.3252	-0.7672	0.4469	1	-0.4066	-0.8588	0.04565	-1.81	0.07686	1
MYC		ns	0.4032	-0.3345	1.141	1.101	0.2769	1	0.397	-0.238	1.032	1.259	0.2145	1
TRIM21		ns	0.1669	-0.2723	0.6062	0.7652	0.4481	1	-0.02206	-0.4001	0.356	-0.1175	0.907	1
OAS3		ns	0.6499	-0.2091	1.509	1.524	0.1346	1	0.3998	-0.3395	1.139	1.089	0.2819	1
CCL3/L1		ns	0.232	-0.6775	1.141	0.5136	0.61	1	0.4042	-0.3786	1.187	1.04	0.304	1
PDK1		ns	0.1697	-0.4247	0.7641	0.5748	0.5683	1	0.4072	-0.1043	0.9188	1.603	0.1159	1
OAS2		ns	0.5833	-0.3086	1.475	1.317	0.1945	1	0.4076	-0.36	1.175	1.069	0.2906	1
TNF		ns	0.3579	-0.8438	1.56	0.5997	0.5517	1	0.4113	-0.6229	1.446	0.8009	0.4274	1
GPR160		ns	-0.3457	-1.279	0.5876	-0.7459	0.4596	1	-0.1025	-0.9058	0.7008	-0.2569	0.7984	1
LAG3		ns	0.4991	-0.474	1.472	1.033	0.3072	1	0.4116	-0.4259	1.249	0.9898	0.3275	1
PRF1		ns	0.3348	-0.5776	1.247	0.7389	0.4638	1	-0.3228	-1.108	0.4625	-0.8277	0.4122	1
COL6A3		ns	0.3672	-0.6394	1.374	0.7345	0.4664	1	-0.4374	-1.304	0.429	-1.017	0.3148	1
SIGLEC1		ns	0.7275	-0.02076	1.476	1.958	0.05642	1	0.4217	-0.2223	1.066	1.318	0.194	1
ITGB8		ns	0.7064	-0.021	1.434	1.956	0.0567	1	0.4229	-0.2032	1.049	1.36	0.1805	1
LGALS9		ns	0.2587	-0.4437	0.9612	0.7417	0.4621	1	0.4291	-0.1754	1.034	1.429	0.1597	1
HDAC11	X	ns	0.1664	-0.3769	0.7097	0.6169	0.5404	1	0.4303	-0.03725	0.8979	1.853	0.07036	1
CD1C		ns	0.2603	-0.4631	0.9837	0.7246	0.4724	1	-0.4595	-1.082	0.163	-1.486	0.1441	1
CD96		ns	0.2765	-0.4945	1.047	0.7221	0.4739	1	-0.00474	-0.6683	0.6588	-0.01438	0.9886	1
ICAM2		ns	-0.2942	-1.123	0.5344	-0.715	0.4782	1	-0.1621	-0.8753	0.551	-0.4578	0.6492	1
ICAM3		ns	-0.19	-0.7256	0.3455	-0.7145	0.4786	1	-0.08861	-0.5495	0.3723	-0.3871	0.7005	1
EGR1		ns	0.4179	-0.7683	1.604	0.7094	0.4817	1	-0.05813	-1.079	0.9628	-0.1146	0.9092	1
CXCL1		ns	-0.5402	-2.101	1.021	-0.6968	0.4895	1	-0.9673	-2.311	0.3764	-1.45	0.154	1
SELL		ns	0.3167	-0.5995	1.233	0.696	0.49	1	-0.4071	-1.196	0.3814	-1.04	0.304	1
PC		ns	-0.1841	-0.8309	0.4626	-0.5733	0.5692	1	0.4365	-0.1201	0.9932	1.579	0.1212	1
MLH1	X	ns	-0.1121	-0.4412	0.2171	-0.6857	0.4964	1	-0.1385	-0.4218	0.1448	-0.9846	0.33	1
IL11		ns	-0.32	-1.263	0.6234	-0.683	0.4981	1	-0.5387	-1.351	0.2733	-1.336	0.1882	1
CD45RO		ns	0.7444	-0.09496	1.584	1.786	0.08081	1	0.4385	-0.2839	1.161	1.222	0.2279	1
B2M		ns	0.2312	-0.452	0.9144	0.6813	0.4991	1	-0.1495	-0.7375	0.4385	-0.512	0.6112	1
WNT4		ns	-0.3224	-1.277	0.6322	-0.6801	0.4999	1	-0.2284	-1.05	0.5932	-0.5598	0.5784	1
CCND3		ns	0.1717	-0.3372	0.6806	0.6795	0.5003	1	-0.09979	-0.5378	0.3382	-0.4588	0.6486	1
IL18R1		ns	-0.2291	-0.9201	0.462	-0.6674	0.5079	1	-0.3579	-0.9526	0.2369	-1.212	0.2319	1
IRF4		ns	0.03316	-1.44	1.506	0.04533	0.964	1	0.4422	-0.8258	1.71	0.7022	0.4861	1
VCAN		ns	0.454	-0.9549	1.863	0.6489	0.5197	1	-0.3589	-1.572	0.8537	-0.596	0.5541	1
GIMAP6		ns	0.1926	-0.4055	0.7906	0.6484	0.52	1	-0.111	-0.6257	0.4038	-0.4341	0.6663	1
TNFRSF8		ns	0.3284	-0.694	1.351	0.6468	0.521	1	-0.06232	-0.9423	0.8176	-0.1426	0.8872	0.9793
SLC7A5		ns	-0.2809	-1.172	0.6102	-0.6348	0.5287	1	-0.1585	-0.9254	0.6085	-0.4161	0.6793	1
FAP		ns	0.2953	-0.6416	1.232	0.6346	0.5289	1	-0.6196	-1.426	0.1867	-1.547	0.1287	1
SIGLEC8		ns	-0.3377	-1.427	0.7519	-0.6241	0.5357	1	-0.3573	-1.295	0.5805	-0.7673	0.4469	1
FGF18		ns	-0.01139	-1.081	1.058	-0.02145	0.983	1	0.4549	-0.4655	1.375	0.9953	0.3249	1
MAP3K12		ns	-0.2149	-0.9102	0.4804	-0.6223	0.5369	1	-0.06433	-0.6628	0.5341	-0.2165	0.8296	1
VSIR		ns	0.7194	-0.1116	1.55	1.743	0.08808	1	0.4588	-0.2564	1.174	1.292	0.203	1
ROR2		ns	-0.2468	-1.052	0.558	-0.6175	0.54	1	-0.4973	-1.19	0.1954	-1.446	0.1551	1
IL32		ns	0.04663	-0.8275	0.9207	0.1074	0.9149	1	0.4694	-0.2829	1.222	1.257	0.2154	1
FCRL2		ns	-0.1329	-1.204	0.9381	-0.2499	0.8038	1	0.4699	-0.4519	1.392	1.026	0.3101	1
TNFSF9		ns	-0.1637	-0.7145	0.3871	-0.5984	0.5526	1	-0.2063	-0.6804	0.2677	-0.8765	0.3854	1
IL11RA		ns	-0.1843	-0.8081	0.4394	-0.5951	0.5548	1	-0.07354	-0.6104	0.4633	-0.2759	0.7839	1
TLR9		ns	-0.1872	-0.8205	0.4462	-0.5951	0.5548	1	-0.04395	-0.589	0.5011	-0.1624	0.8717	1
FOSL1		ns	-0.2828	-1.241	0.6753	-0.5944	0.5552	1	-0.4682	-1.293	0.3564	-1.143	0.2589	1
ISG15		ns	1.021	-0.05942	2.102	1.903	0.0634	1	0.4716	-0.4586	1.402	1.021	0.3127	1
GPC4		ns	-0.2876	-1.284	0.7089	-0.5811	0.564	1	-0.33	-1.188	0.5277	-0.7748	0.4425	1
CES3		ns	-0.5211	-1.627	0.5846	-0.949	0.3476	1	0.4759	-0.4757	1.428	1.007	0.3192	1
CD3D		ns	0.6488	-0.5388	1.836	1.1	0.2771	1	0.4886	-0.5335	1.511	0.9626	0.3409	1
WNT7B		ns	0.34	-0.8561	1.536	0.5724	0.5699	1	-0.2837	-1.313	0.7458	-0.5549	0.5817	1
CCL2		ns	0.4242	-0.5273	1.376	0.8977	0.3741	1	0.502	-0.3169	1.321	1.234	0.2234	1
CD2		ns	0.5379	-0.379	1.455	1.181	0.2436	1	0.5053	-0.2839	1.294	1.289	0.2038	1
CD244		ns	-0.1887	-0.8661	0.4887	-0.561	0.5776	1	-0.4466	-1.03	0.1364	-1.543	0.1299	1
PIK3R1		ns	-0.179	-0.8312	0.4731	-0.5528	0.5831	1	-0.5004	-1.062	0.06091	-1.795	0.0793	1
CD14		ns	0.1959	-0.5188	0.9106	0.552	0.5836	1	-0.07136	-0.6865	0.5438	-0.2336	0.8163	1
PRKCA		ns	0.2095	-0.5562	0.9753	0.5511	0.5843	1	-0.03061	-0.6896	0.6284	-0.09354	0.9259	1
CCL5		ns	0.7603	-0.4332	1.954	1.283	0.2061	1	0.5163	-0.5109	1.544	1.012	0.3169	1
TIE1		ns	0.145	-0.388	0.6779	0.5477	0.5866	1	-0.1472	-0.6059	0.3115	-0.6461	0.5215	1
PGPEP1		ns	-0.1639	-0.7749	0.4472	-0.54	0.5919	1	-0.1391	-0.6651	0.3868	-0.5326	0.5969	1
PMS2	X	ns	-0.1233	-0.5837	0.3372	-0.5392	0.5924	1	-0.1548	-0.5511	0.2415	-0.7866	0.4356	1
TIGIT		ns	0.5181	-0.7216	1.758	0.8416	0.4044	1	0.5221	-0.5449	1.589	0.9853	0.3297	1
TLR2		ns	0.1571	-0.442	0.7562	0.528	0.6001	1	-0.2048	-0.7205	0.3108	-0.7999	0.4279	1
LDHB		ns	-0.203	-0.9788	0.5727	-0.5271	0.6007	1	-0.1657	-0.8334	0.5019	-0.4998	0.6196	0.942
ULBP2		ns	-0.2072	-0.9995	0.5852	-0.5265	0.6011	1	-0.6245	-1.306	0.05745	-1.844	0.07171	1
PIK3CD		ns	0.6637	-0.1074	1.435	1.733	0.08985	1	0.5376	-0.126	1.201	1.631	0.1098	1
PSMB5		ns	-0.11	-0.5335	0.3134	-0.5233	0.6033	1	-0.0826	-0.4471	0.2819	-0.4564	0.6503	1
GBP4		ns	0.8273	-0.1535	1.808	1.699	0.09626	1	0.5402	-0.3039	1.384	1.289	0.204	1
ERBB2		ns	0.1235	-0.3553	0.6023	0.5194	0.606	1	-0.001392	-0.4135	0.4107	-0.006802	0.9946	1
GZMB		ns	-0.2821	-1.376	0.8118	-0.5192	0.6061	1	-0.5559	-1.497	0.3855	-1.189	0.2406	1
TNFSF18		ns	-0.2416	-1.188	0.7051	-0.514	0.6098	1	-0.4929	-1.308	0.3219	-1.218	0.2294	1
COMP		ns	0.9353	-0.5998	2.47	1.227	0.2262	1	0.5445	-0.7767	1.866	0.8299	0.4109	1
GZMH		ns	-0.2231	-1.117	0.6703	-0.5029	0.6175	1	-0.07866	-0.8476	0.6903	-0.206	0.8377	1
BLM	X	ns	0.6717	-0.05781	1.401	1.854	0.07024	1	0.5585	-0.06931	1.186	1.791	0.07991	1
SLAMF7		ns	0.3372	-1.09	1.764	0.4757	0.6366	1	0.5627	-0.6657	1.791	0.9225	0.3612	1
ATF3		ns	-0.2927	-1.489	0.9034	-0.4928	0.6245	1	-0.3293	-1.359	0.7002	-0.6441	0.5228	1
P4HA1		ns	0.1365	-0.4233	0.6963	0.4911	0.6257	1	-0.1772	-0.659	0.3046	-0.7408	0.4626	0.8964
IL1RN		ns	0.4256	-0.6165	1.468	0.8224	0.4152	1	0.5685	-0.3284	1.465	1.276	0.2083	1
NOTCH2		ns	-0.0973	-0.5002	0.3056	-0.4864	0.6291	1	-0.0128	-0.3595	0.3339	-0.07433	0.9411	1
ESR1		ns	-0.247	-1.287	0.7929	-0.4783	0.6347	1	-0.4301	-1.325	0.4649	-0.9677	0.3383	1
TREM1		ns	0.206	-0.6714	1.083	0.4729	0.6386	1	-0.2226	-0.9778	0.5325	-0.5937	0.5557	1
CD40LG		ns	-0.2159	-1.14	0.7086	-0.4702	0.6404	1	-0.2197	-1.015	0.576	-0.5559	0.581	1
MS4A4A		ns	0.1541	-0.5204	0.8287	0.4602	0.6476	1	-0.3564	-0.9369	0.2242	-1.236	0.2228	1
CD45RA		ns	0.2083	-0.7153	1.132	0.4541	0.6519	1	-0.06692	-0.8619	0.728	-0.1695	0.8661	1
ICAM1		ns	0.6922	-0.2834	1.668	1.429	0.1599	1	0.5973	-0.2424	1.437	1.432	0.1589	1
JAG2		ns	0.2395	-0.5829	1.062	0.5864	0.5605	1	0.6058	-0.1019	1.314	1.724	0.09157	1
CD6		ns	-0.2012	-1.111	0.7083	-0.4454	0.6581	1	-0.1323	-0.915	0.6504	-0.3404	0.7351	1
TRAT1		ns	-0.2182	-1.211	0.7746	-0.4426	0.6601	1	-0.1155	-0.97	0.739	-0.2722	0.7867	1
MB21D1		ns	0.5602	-0.1904	1.311	1.503	0.1398	1	0.6164	-0.02956	1.262	1.922	0.06096	1
P2RY13		ns	-0.2003	-1.118	0.7172	-0.4396	0.6623	1	-0.282	-1.072	0.5077	-0.7191	0.4758	1
FUT4		ns	-0.1331	-0.7543	0.488	-0.4316	0.668	1	-0.07662	-0.6112	0.4579	-0.2886	0.7742	1
RB1		ns	-0.1093	-0.6198	0.4011	-0.4313	0.6683	1	-0.3842	-0.8235	0.05513	-1.761	0.08498	1
RPS6KB1		ns	0.08652	-0.3201	0.4931	0.4285	0.6703	1	-0.1691	-0.519	0.1809	-0.9729	0.3358	0.04601
CDK2		ns	-0.1024	-0.586	0.3811	-0.4266	0.6717	1	-0.03386	-0.45	0.3823	-0.1638	0.8706	1
TNFAIP3		ns	0.134	-0.5077	0.7756	0.4204	0.6762	1	-0.1128	-0.6651	0.4395	-0.4113	0.6828	1
IFI35		ns	-0.1179	-0.684	0.4481	-0.4196	0.6768	1	-0.2265	-0.7137	0.2607	-0.9362	0.3541	1
LCK		ns	-0.1936	-1.127	0.7397	-0.4177	0.6782	1	-0.3158	-1.119	0.4875	-0.7916	0.4327	1
PFKFB3		ns	0.1413	-0.5409	0.8235	0.4172	0.6785	1	-0.03375	-0.6209	0.5534	-0.1157	0.9084	1
CCL20		ns	0.3647	-1.26	1.989	0.4521	0.6534	1	0.63	-0.7679	2.028	0.9076	0.3689	1
RAD50	X	ns	0.09375	-0.3718	0.5593	0.4055	0.687	1	-0.1928	-0.5935	0.2078	-0.9692	0.3376	1
HLA-DQA2		ns	0.2355	-0.9535	1.424	0.3988	0.6919	1	-0.2815	-1.305	0.7418	-0.5539	0.5824	1
KLRD1		ns	0.1729	-0.7078	1.054	0.3953	0.6945	1	-0.5008	-1.259	0.2572	-1.33	0.19	1
KAT2B		ns	0.1029	-0.4262	0.632	0.3915	0.6972	1	-0.1307	-0.586	0.3247	-0.5778	0.5662	1
DNMT1	X	ns	-0.08418	-0.5235	0.3551	-0.3858	0.7014	1	-0.0832	-0.4613	0.2949	-0.4431	0.6598	1
COL5A1		ns	0.1774	-0.7534	1.108	0.3838	0.7029	1	-0.5584	-1.36	0.2427	-1.404	0.1672	0.9966
MRC1		ns	-0.1529	-0.9606	0.6548	-0.3811	0.7049	1	-0.6922	-1.387	0.002976	-2.005	0.05095	1
TNFRSF9		ns	0.1318	-0.5708	0.8344	0.3778	0.7074	1	-0.1839	-0.7886	0.4208	-0.6124	0.5433	1
FASLG	X	ns	0.2192	-0.9512	1.39	0.3771	0.7078	1	-0.04441	-1.052	0.9629	-0.08878	0.9296	1
MS4A6A		ns	0.1436	-0.6357	0.9229	0.371	0.7123	1	-0.234	-0.9047	0.4367	-0.7025	0.486	1
DUSP5		ns	-0.21	-1.351	0.9309	-0.3707	0.7126	1	-0.1465	-1.128	0.8355	-0.3003	0.7653	1
IL18		ns	0.1536	-0.6859	0.9932	0.3685	0.7142	1	-0.1502	-0.8728	0.5724	-0.4186	0.6775	1
NFKB1		ns	0.06327	-0.2959	0.4224	0.3548	0.7244	1	-0.03658	-0.3457	0.2725	-0.2383	0.8127	1
MAP3K5		ns	-0.1155	-0.7757	0.5447	-0.3522	0.7263	1	-0.1612	-0.7294	0.407	-0.5712	0.5707	1
RBL2		ns	0.07712	-0.3688	0.5231	0.3482	0.7293	1	-0.07136	-0.4552	0.3125	-0.3744	0.7099	1
MMP1		ns	0.2306	-1.108	1.569	0.3469	0.7303	1	-0.3791	-1.531	0.7729	-0.6627	0.5109	1
CD79B		ns	0.1404	-0.6751	0.9559	0.3467	0.7304	1	-0.008865	-0.7107	0.693	-0.02544	0.9798	1
HLA-B		ns	0.1357	-0.6527	0.924	0.3465	0.7306	1	-0.1843	-0.8628	0.4942	-0.5471	0.587	1
WNT11		ns	-0.004595	-1.367	1.358	-0.006793	0.9946	1	0.6495	-0.5228	1.822	1.116	0.2704	1
VEGFA		ns	0.6018	-0.1943	1.398	1.522	0.1349	1	0.6538	-0.03144	1.339	1.921	0.06099	1
SIRPA		ns	0.0939	-0.4724	0.6602	0.3339	0.74	1	-0.31	-0.7974	0.1773	-1.281	0.2067	1
TNKS		ns	-0.06891	-0.4919	0.3541	-0.3281	0.7444	1	-0.2797	-0.6438	0.08434	-1.547	0.1288	1
RASGRF1		ns	-0.1427	-1.02	0.7351	-0.3273	0.7449	1	-0.1633	-0.9188	0.5922	-0.4353	0.6654	1
CCR4		ns	0.1488	-0.7677	1.065	0.3269	0.7452	1	-0.1438	-0.9326	0.645	-0.3672	0.7152	1
C5AR1		ns	-0.1337	-0.9657	0.6984	-0.3235	0.7478	1	-0.6871	-1.403	0.02904	-1.932	0.05962	1
BLK		ns	-0.1088	-0.786	0.5685	-0.3234	0.7479	1	-0.123	-0.7059	0.4599	-0.4248	0.673	1
CCL8		ns	0.1789	-1.086	1.444	0.2849	0.777	1	0.6586	-0.4298	1.747	1.218	0.2293	1
DUSP1		ns	-0.1894	-1.386	1.008	-0.3186	0.7515	1	-0.5435	-1.574	0.4868	-1.062	0.2937	1
EGF		ns	-0.1796	-1.324	0.965	-0.316	0.7534	1	-0.4483	-1.433	0.5369	-0.9163	0.3643	1
STAT4		ns	-0.1369	-1.011	0.7373	-0.3154	0.7539	1	-0.2049	-0.9573	0.5474	-0.5485	0.586	1
HLA-A		ns	0.9095	-0.6304	2.449	1.189	0.2405	1	0.6618	-0.6635	1.987	1.006	0.32	1
F2RL1		ns	-0.09717	-0.7333	0.5389	-0.3076	0.7598	1	-0.32	-0.8674	0.2275	-1.177	0.2454	1
FZD8		ns	0.1381	-0.7873	1.063	0.3004	0.7652	1	-0.3317	-1.128	0.4647	-0.8387	0.406	1
AQP9		ns	-0.1602	-1.235	0.9142	-0.3003	0.7653	1	-0.4128	-1.338	0.5119	-0.8989	0.3734	1
FSTL3		ns	0.1322	-0.7699	1.034	0.2951	0.7693	1	-0.3852	-1.162	0.3913	-0.999	0.3231	1
LILRB2		ns	0.1017	-0.6128	0.8163	0.2867	0.7756	1	-0.2528	-0.8678	0.3622	-0.8278	0.4121	1
MARCO		ns	0.1848	-1.116	1.485	0.2862	0.776	1	-0.2197	-1.339	0.8995	-0.3953	0.6945	1
LTBP1		ns	0.118	-0.7152	0.9512	0.2852	0.7768	1	-0.4145	-1.132	0.3025	-1.164	0.2505	1
CTNNB1		ns	-0.07424	-0.6023	0.4538	-0.2831	0.7784	1	-0.1625	-0.617	0.292	-0.72	0.4752	1
CXCR3		ns	0.1132	-0.7002	0.9266	0.2803	0.7806	1	-0.1072	-0.8072	0.5929	-0.3082	0.7593	1
CD5		ns	-0.1416	-1.169	0.8863	-0.2773	0.7828	1	-0.08016	-0.9648	0.8045	-0.1825	0.856	1
MS4A1		ns	-0.1196	-0.9899	0.7507	-0.2768	0.7832	1	-0.233	-0.9821	0.516	-0.6265	0.5342	1
CDKN1C		ns	-0.1227	-1.022	0.7763	-0.2748	0.7847	1	-0.7645	-1.538	0.009274	-1.99	0.05269	1
BCL6B		ns	-0.08627	-0.7296	0.5571	-0.27	0.7884	1	-0.2612	-0.8149	0.2926	-0.9497	0.3473	1
VEGFC		ns	0.09134	-0.593	0.7757	0.2688	0.7893	1	-0.4201	-1.009	0.1689	-1.436	0.1578	1
CCR2		ns	-0.1422	-1.209	0.9244	-0.2684	0.7896	1	-0.04183	-0.9598	0.8761	-0.09176	0.9273	1
PARP4	X	ns	0.06314	-0.4128	0.5391	0.2671	0.7906	1	-0.1312	-0.5408	0.2784	-0.645	0.5222	1
LYZ		ns	-0.1639	-1.402	1.074	-0.2667	0.7909	1	-0.2605	-1.326	0.8048	-0.4924	0.6248	1
CSF3R		ns	-0.1393	-1.231	0.9521	-0.257	0.7983	1	-0.2635	-1.203	0.6759	-0.5648	0.575	1
CDH2		ns	-0.1651	-1.476	1.146	-0.2534	0.8011	1	-0.855	-1.984	0.2737	-1.525	0.1341	1
HDAC4	X	ns	-0.06714	-0.6014	0.4671	-0.2531	0.8014	1	-0.1249	-0.5847	0.3349	-0.5471	0.587	1
CCNA1	X	ns	0.5229	-0.92	1.966	0.7298	0.4693	1	0.7427	-0.4991	1.985	1.204	0.2347	1
IFNGR2		ns	0.05661	-0.4004	0.5136	0.2494	0.8042	1	-0.085	-0.4784	0.3084	-0.4352	0.6655	1
NOS2		ns	-0.1109	-1.006	0.7842	-0.2494	0.8042	1	-0.09706	-0.8674	0.6732	-0.2537	0.8009	1
PDCD1LG2		ns	0.1073	-0.7659	0.9806	0.2475	0.8056	1	-0.1271	-0.8786	0.6245	-0.3405	0.7351	1
MMP9		ns	-0.1464	-1.368	1.076	-0.2412	0.8105	1	-0.3505	-1.402	0.7012	-0.6711	0.5055	0.8964
BCAT1		ns	0.8191	-0.3097	1.948	1.461	0.1509	1	0.7569	-0.2146	1.728	1.569	0.1236	1
ICOS		ns	-0.09136	-0.9266	0.7439	-0.2203	0.8267	1	-0.04358	-0.7625	0.6753	-0.1221	0.9034	1
CTAG1B		ns	-0.4181	-1.901	1.065	-0.5675	0.5732	1	0.8047	-0.472	2.081	1.269	0.2108	1
ZAP70		ns	-0.1155	-1.188	0.9574	-0.2167	0.8294	1	-0.07843	-1.002	0.845	-0.171	0.865	1
PTCD2		ns	-0.05469	-0.585	0.4757	-0.2077	0.8364	1	-0.111	-0.5675	0.3454	-0.4898	0.6266	1
PIK3R5		ns	0.08433	-0.7439	0.9126	0.205	0.8385	1	-0.1294	-0.8423	0.5834	-0.3656	0.7163	1
CX3CR1		ns	-0.1219	-1.334	1.091	-0.2025	0.8405	1	-0.182	-1.226	0.8616	-0.3511	0.7271	1
CDKN2B		ns	0.07786	-0.6985	0.8542	0.202	0.8408	1	-0.05511	-0.7233	0.613	-0.1661	0.8688	0.04601
IFNGR1		ns	-0.04647	-0.5126	0.4197	-0.2008	0.8418	1	-0.3079	-0.7091	0.09332	-1.545	0.1292	1
SOX11		ns	-0.08082	-0.9099	0.7482	-0.1963	0.8453	1	-0.6531	-1.367	0.06048	-1.843	0.07187	1
CD38		ns	0.6525	-0.4929	1.798	1.147	0.2574	1	0.8302	-0.1557	1.816	1.696	0.0968	1
MAGEB2	X	ns	0.0749	-0.7013	0.8511	0.1943	0.8468	1	-0.3056	-0.9737	0.3624	-0.9212	0.3618	1
FCAR		ns	-0.0815	-0.9399	0.7769	-0.1912	0.8492	1	-0.3244	-1.063	0.4144	-0.8842	0.3812	1
CTLA4		ns	-0.1161	-1.384	1.152	-0.1845	0.8545	1	-0.05868	-1.15	1.032	-0.1083	0.9142	1
BIRC3	X	ns	0.1022	-1.031	1.236	0.1816	0.8567	1	-0.4271	-1.403	0.5485	-0.8815	0.3827	1
CD79A		ns	0.1374	-1.397	1.672	0.1803	0.8577	1	0.839	-0.4815	2.159	1.279	0.2073	1
RNLS		ns	0.05416	-0.579	0.6873	0.1722	0.864	1	-0.06579	-0.6107	0.4791	-0.2431	0.809	1
SRP54		ns	-0.03109	-0.3972	0.3351	-0.171	0.865	1	-0.06792	-0.383	0.2472	-0.434	0.6664	1
LIF		ns	0.1083	-1.198	1.414	0.167	0.8681	1	-0.0001207	-1.124	1.124	-0.0002162	0.9998	1
SPIB		ns	-0.06057	-0.7998	0.6786	-0.165	0.8697	1	-0.1721	-0.8083	0.4641	-0.5447	0.5886	1
LRRC32		ns	-0.06312	-0.874	0.7477	-0.1568	0.8761	1	-0.2147	-0.9125	0.4832	-0.6195	0.5387	1
ZEB2		ns	0.04198	-0.5294	0.6134	0.1479	0.883	1	-0.3603	-0.8521	0.1315	-1.475	0.147	0.8964
BCL2L1		ns	0.03798	-0.4828	0.5588	0.1469	0.8839	1	-0.1091	-0.5573	0.3391	-0.49	0.6265	1
CXCL6		ns	0.1023	-1.31	1.515	0.1458	0.8847	1	-0.5149	-1.731	0.701	-0.8528	0.3982	1
PDGFRB		ns	0.04571	-0.5904	0.6818	0.1447	0.8856	1	-0.4698	-1.017	0.07773	-1.728	0.09083	1
P4HA2		ns	0.04974	-0.6447	0.7441	0.1442	0.886	1	-0.3962	-0.9938	0.2015	-1.335	0.1886	1
TGFB1		ns	0.04981	-0.6534	0.753	0.1426	0.8872	1	-0.3691	-0.9743	0.2362	-1.228	0.2258	1
FCN1		ns	0.05208	-0.7133	0.8175	0.137	0.8916	1	-0.1676	-0.8264	0.4911	-0.5125	0.6108	1
ENTPD1		ns	-0.03952	-0.6264	0.5473	-0.1356	0.8927	1	-0.4552	-0.9603	0.04983	-1.815	0.07614	1
IER3		ns	0.05902	-0.8572	0.9753	0.1297	0.8974	1	-0.3236	-1.112	0.465	-0.8263	0.413	1
SIGLEC5		ns	-0.04923	-0.867	0.7686	-0.1212	0.9041	1	-0.3787	-1.083	0.3252	-1.083	0.2843	1
PLA2G2A		ns	-0.08698	-1.532	1.358	-0.1212	0.9041	1	-0.4095	-1.653	0.8343	-0.6629	0.5107	1
SELP		ns	-0.03923	-0.6954	0.617	-0.1204	0.9047	1	-0.1668	-0.7316	0.398	-0.5948	0.5549	1
IL7R		ns	-0.05713	-1.026	0.9116	-0.1188	0.906	1	-0.2947	-1.128	0.539	-0.7119	0.4802	1
KLRB1		ns	-0.04823	-0.87	0.7735	-0.1182	0.9064	1	-0.1566	-0.8638	0.5506	-0.4459	0.6578	1
ADGRE1		ns	0.05088	-0.8175	0.9193	0.118	0.9066	1	-0.4798	-1.227	0.2675	-1.293	0.2026	1
NFIL3		ns	-0.03727	-0.674	0.5995	-0.1179	0.9067	1	-0.1746	-0.7226	0.3735	-0.6415	0.5244	1
C7		ns	-0.09617	-1.773	1.581	-0.1155	0.9086	1	-0.646	-2.089	0.7975	-0.9012	0.3722	1
CD45RB		ns	-0.03268	-0.6072	0.5418	-0.1146	0.9093	1	-0.2195	-0.714	0.2749	-0.8941	0.376	1
PECAM1		ns	0.03205	-0.5337	0.5978	0.1141	0.9097	1	-0.3245	-0.8114	0.1624	-1.342	0.1863	0.9417
LILRA3		ns	-0.04734	-0.8847	0.79	-0.1138	0.9099	1	-0.5509	-1.272	0.1697	-1.539	0.1306	1
MYCT1		ns	0.02649	-0.4485	0.5014	0.1123	0.9111	1	-0.05037	-0.4591	0.3584	-0.2481	0.8052	1
HMGB1		ns	0.02899	-0.5451	0.603	0.1017	0.9195	1	-0.09799	-0.5921	0.3961	-0.3994	0.6915	1
CXCL2		ns	-0.07492	-1.647	1.498	-0.09595	0.924	1	-0.3034	-1.657	1.05	-0.4514	0.6539	1
INHBA		ns	-0.05346	-1.19	1.083	-0.09474	0.9249	1	-0.7557	-1.734	0.2223	-1.556	0.1267	1
TICAM1		ns	0.02538	-0.5202	0.571	0.09369	0.9258	1	-0.2399	-0.7095	0.2297	-1.029	0.309	1
IDO1		ns	0.07011	-1.446	1.587	0.0931	0.9262	1	-0.1686	-1.474	1.137	-0.2601	0.796	1
TGFBR1		ns	0.01848	-0.3885	0.4255	0.09145	0.9275	1	-0.03539	-0.3857	0.3149	-0.2035	0.8397	1
TNFRSF17		ns	0.3044	-1.234	1.843	0.3985	0.6922	1	0.9656	-0.3582	2.289	1.469	0.1488	1
TLR7		ns	-0.0333	-0.7889	0.7223	-0.08873	0.9297	1	-0.3886	-1.039	0.2617	-1.203	0.2351	1
MMP7		ns	0.6338	-0.9953	2.263	0.7834	0.4374	1	0.9701	-0.4321	2.372	1.393	0.1704	1
TPM1		ns	-0.02411	-0.6223	0.5741	-0.08115	0.9357	1	-0.2881	-0.803	0.2268	-1.127	0.2657	1
TNFRSF4		ns	-0.02447	-0.6719	0.6229	-0.07612	0.9397	1	-0.2607	-0.8179	0.2965	-0.9421	0.3512	1
CXCL9		ns	0.203	-1.772	2.178	0.207	0.8369	1	1.065	-0.6352	2.765	1.261	0.2137	1
S100A8		ns	-0.05786	-1.788	1.673	-0.06733	0.9466	1	-0.07831	-1.568	1.411	-0.1059	0.9161	1
SERPINH1		ns	-0.01918	-0.6335	0.5952	-0.06286	0.9502	1	-0.0176	-0.5464	0.5111	-0.06704	0.9468	1
FBP1		ns	0.02198	-0.6866	0.7306	0.06247	0.9505	1	-0.3626	-0.9725	0.2472	-1.197	0.2374	1
SOX2		ns	-1.157	-3.073	0.7579	-1.217	0.23	1	1.072	-0.5765	2.72	1.309	0.197	1
WNT10A		ns	0.9691	-0.5087	2.447	1.32	0.1933	1	1.179	-0.09255	2.451	1.867	0.06835	1
LILRA1		ns	0.02029	-0.6665	0.7071	0.05948	0.9528	1	-0.1941	-0.7853	0.397	-0.6614	0.5117	1
SFRP1		ns	0.03305	-1.114	1.18	0.05801	0.954	1	-0.5092	-1.497	0.4782	-1.038	0.3046	1
NLRP3		ns	-0.02158	-0.7871	0.7439	-0.05677	0.955	1	-0.6027	-1.262	0.05617	-1.842	0.07202	0.5957
CD3G		ns	0.01815	-0.6538	0.6901	0.0544	0.9569	1	-0.3	-0.8783	0.2783	-1.045	0.3017	1
HLA-DOB		ns	-0.0242	-0.9842	0.9358	-0.05076	0.9597	1	-0.2551	-1.081	0.5712	-0.6216	0.5373	1
PNOC		ns	1.076	-0.6241	2.775	1.274	0.209	1	1.381	-0.08222	2.844	1.901	0.06373	1
PTEN		ns	-0.01131	-0.5292	0.5066	-0.04397	0.9651	1	-0.2433	-0.689	0.2024	-1.099	0.2775	1
SLC1A5		ns	-0.01442	-0.7066	0.6778	-0.04194	0.9667	1	-0.1677	-0.7634	0.4281	-0.5667	0.5737	0.6977
STAT3		ns	0.008671	-0.4229	0.4402	0.04046	0.9679	1	-0.2823	-0.6537	0.08911	-1.531	0.1328	1
RIPK3		ns	-0.01361	-0.6982	0.6709	-0.04005	0.9682	1	-0.2088	-0.7979	0.3804	-0.7136	0.4791	1
CXCL12		ns	0.01663	-0.9138	0.9471	0.03599	0.9714	1	-0.2469	-1.048	0.5539	-0.6207	0.5379	1
PRKX		ns	0.01247	-0.7492	0.7741	0.03297	0.9738	1	-0.008718	-0.6642	0.6468	-0.02678	0.9788	1
NFAM1		ns	-0.01223	-0.781	0.7566	-0.03202	0.9746	1	-0.2119	-0.8735	0.4498	-0.6448	0.5223	1
CX3CL1		ns	-0.01508	-0.9872	0.9571	-0.03123	0.9752	1	-0.2849	-1.122	0.5518	-0.6856	0.4965	1
OTOA		ns	-0.009952	-0.7246	0.7047	-0.02804	0.9778	1	-0.2835	-0.8986	0.3316	-0.928	0.3583	1
GMIP		ns	0.006679	-0.5164	0.5298	0.02571	0.9796	1	-0.04692	-0.4971	0.4033	-0.2098	0.8347	1
IL10		ns	-0.008418	-0.7221	0.7053	-0.02375	0.9812	1	-0.06527	-0.6795	0.549	-0.214	0.8315	1
SPRY4		ns	-0.009158	-0.8166	0.7982	-0.02284	0.9819	1	-0.3631	-1.058	0.3318	-1.052	0.2983	1
MICA		ns	-0.004766	-0.4847	0.4751	-0.02	0.9841	1	-0.08952	-0.5025	0.3235	-0.4364	0.6646	1
CD7		ns	0.007587	-0.7704	0.7855	0.01964	0.9844	1	-0.2573	-0.9269	0.4122	-0.7739	0.443	1
JAG1		ns	0.00626	-0.6428	0.6554	0.01942	0.9846	1	-0.1871	-0.7458	0.3715	-0.6745	0.5034	1
EPCAM		ns	0.003008	-0.6326	0.6386	0.009531	0.9924	1	-0.0491	-0.5961	0.4979	-0.1807	0.8574	1
HLA-DRB5		ns	2.043	-1.376	5.461	1.203	0.2351	1	2.174	-0.7675	5.116	1.488	0.1436	1
CCL7		ns	0.0002345	-0.9577	0.9582	0.000493	0.9996	1	-0.4655	-1.29	0.359	-1.137	0.2616	1
TLR8		ns	4.616e-05	-0.8008	0.8009	0.0001161	0.9999	1	-0.4702	-1.159	0.2191	-1.374	0.1763	1

## Sheet: STRING BRCA1mut and BRCA1met
27 genes down-regulated
name	gene description	GO enriched: Molecular function	GO enriched: Biological Process	Enriched pathway
BAMBI	BMP and activin membrane bound inhibitor	signaling receptor binding	cell signaling
BCL2	BCL2 apoptosis regulator		cell death/apoptosis	Direct p53 effectors/PI3K/AKT Signaling in Cancer
BMP2	bone morphogenetic protein 2	signaling receptor binding	cell signaling
BNIP3L	BCL2 interacting protein 3 like		cell death/apoptosis	Direct p53 effectors
CDKN1A	cyclin dependent kinase inhibitor 1A		cell death/apoptosis	Direct p53 effectors/PI3K/AKT Signaling in Cancer
COL17A1	collagen type XVII alpha 1 chain
DEFB134	defensin Beta 134
DKK1	dickkopf WNT signaling pathway inhibitor 1	signaling receptor binding	cell death/apoptosis/cell signaling	Direct p53 effectors
DLL1	delta like canonical Notch ligand 1	signaling receptor binding	cell death/apoptosis/cell signaling
FAM124B	Family With Sequence Similarity 124 Member B
FGF9	fibroblast growth factor 9	signaling receptor binding	cell signaling	PI3K/AKT Signaling in Cancer
GLI1	GLI family zinc finger 1		cell signaling
HNF1A	HNF1 homeobox A		cell death/apoptosis
IGF2R	insulin like growth factor 2 receptor		apoptosis
IHH	Indian hedgehog signaling molecule	signaling receptor binding	cell death/apoptosis
ITGA1	integrin subunit alpha 1	signaling receptor binding	cell signaling	PI3K/AKT Signaling in Cancer
ITGA6	integrin subunit alpha 6	signaling receptor binding	cell death/apoptosis/cell signaling	PI3K/AKT Signaling in Cancer
KIR3DL2	killer cell immunoglobulin like receptor, three Ig domains and long cytoplasmic tail 2	signaling receptor binding	cell death/apoptosis
MAPK10	mitogen-activated protein kinase 10			Ras signaling pathway
MLANA	Melan-A
PDGFA	platelet derived growth factor subunit A	signaling receptor binding		PI3K/AKT Signaling in Cancer
PF4	platelet factor 4	signaling receptor binding	cell death/apoptosis
PLA1A	phospholipase A1 member A			Ras signaling pathway
PTPN11	protein tyrosine phosphatase non-receptor type 11	signaling receptor binding	cell death/apoptosis/cell signaling	PI3K/AKT Signaling in Cancer
STC1	stanniocalcin 1	signaling receptor binding
TNFRSF10C	TNF receptor superfamily member 10c	death receptor activity	cell death/apoptosis/cell signaling	Direct p53 effectors
TNFRSF10D	TNF receptor superfamily member 10d	death receptor activity	cell death/apoptosis	Direct p53 effectors
26 genes up-regulated
name	gene description	GO enriched: Molecular function	GO enriched: Biological Process	Enriched pathway
BRCA2	BRCA2 DNA repair associated	protein C-terminus binding	chromosome organization/cell cycle	cell cycle
CD40	CD40 molecule		immune response	Immune system
CDC20	cell division cycle 20	protein C-terminus binding	chromosome organization/cell cycle	cell cycle
CDC25C	cell division cycle 25C
CENPF	centromere protein F	protein C-terminus binding/chromatin binding	chromosome organization/cell cycle	cell cycle
CRABP2	Cellular Retinoic Acid Binding Protein 2
CXCL10	C-X-C motif chemokine ligand 10	CXCR3 chemokine receptor binding	immune response	Immune system
CXCL11	C-X-C motif chemokine ligand 11	CXCR3 chemokine receptor binding	immune response	Immune system
E2F3	E2F transcription factor 3		cell cycle	cell cycle
EIF2AK2	eukaryotic translation initiation factor 2 alpha kinase 2		immune response	Immune system
EZH2	enhancer of zeste 2 polycomb repressive complex 2 subunit	chromatin binding	chromosome organization/cell cycle	cell cycle
GBP1	guanylate binding protein 1		immune response	Immune system
HELLS	helicase, lymphoid specific	chromatin binding	chromosome organization/immune response
HLA-DQA1	major histocompatibility complex, class II, DQ alpha 1		Immune response	Immune system
HMGA1	high mobility group AT-hook 1	chromatin binding	chromosome organization
ICAM5	Intercellular Adhesion Molecule 5
IL6R	interleukin 6 receptor		immune response	Immune system
IRF7	interferon regulatory factor 7		immune response	Immune system
KIF2C	kinesin family member 2C		chromosome organization/cell cycle	cell cycle
MKI67	marker of proliferation Ki-67	protein C-terminus binding	cell cycle	cell cycle
MRE11	MRE11 homolog, double strand break repair nuclease	protein C-terminus binding	chromosome organization/cell cycle	cell cycle
OASL	2'-5'-oligoadenylate synthetase like		immune response	Immune system
PPARGC1B	PPARG coactivator 1 beta		immune response	Immune system
RSAD2	radical S-adenosyl methionine domain containing 2		immune response	Immune system
UBE2C	ubiquitin conjugating enzyme E2 C	chromatin binding	chromosome organization/cell cycle	cell cycle
UBE2T	ubiquitin conjugating enzyme E2 T	chromatin binding	chromosome organization/cell cycle	cell cycle

## Sheet: STRING BRCA1mut
13 genes down-regulated
name	gene description	GO enriched: Molecular function	GO enriched: Biological Process	Enriched pathway
ARG2	arginase 2		regulation of apoptotic process/cell-cell adhesion
IL1A	interleukin 1 alpha	signaling receptor binding	regulation of apoptotic process/ ion homeostasis/inflammatory response	Cytokine-cytokine receptor interaction/programmed cell death/extracellular matrix related proteins
IL1R2	interleukin 1 receptor type 2		inflammatory response	Cytokine-cytokine receptor interaction
SERPINB5	Serpin Family B Member 5			extracellular matrix related proteins
WNT5B	Wnt family member 5B	signaling receptor binding	ion homeostasis	extracellular matrix related proteins/Pathways in cancer
CCL18	C-C motif chemokine ligand 18	signaling receptor binding	regulation of apoptotic process/ ion homeostasis/inflammatory response	Cytokine-cytokine receptor interaction/extracellular matrix related proteins
CCL13	C-C motif chemokine ligand 13	signaling receptor binding	ion homeostasis/inflammatory response	Cytokine-cytokine receptor interaction/extracellular matrix related proteins
MAGEA4	MAGE family member A4		regulation of apoptotic process
ARNT2	aryl hydrocarbon receptor nuclear translocator 2	signaling receptor binding	regulation of apoptotic process	Pathways in cancer
FYN	FYN proto-oncogene, Src family tyrosine kinase	signaling receptor binding	regulation of apoptotic process/ ion homeostasis/inflammatory response
PVR	PVR cell adhesion molecule		cell-cell adhesion
ADORA2A	adenosine A2a receptor	signaling receptor binding	regulation of apoptotic process/ ion homeostasis/inflammatory response
CASP9	caspase 9		regulation of apoptotic process	programmed cell death/Pathways in cancer
45 genes up-regulated
name	gene description	GO enriched: Molecular function	GO enriched: Biological Process	Enriched pathway
A2M	alpha-2-macroglobulin	cytokine binding	innate immune response
ALDOA	Aldolase, Fructose-Bisphosphate A
BIRC5	baculoviral IAP repeat containing 5	protein dimerization activity		Immune system
BRIP1	BRCA1 Interacting Helicase 1		regulation of cell cycle phase transition
C2	complement C2		innate immune response
CD47	CD47 molecule		innate immune response
CD48	CD48 molecule	antigen binding	innate immune response
CLEC5A	C-type lectin domain containing 5A		innate immune response
CSF1	colony stimulating factor 1	protein dimerization activity	innate immune response	Immune system
CSF1R	colony stimulating factor 1 receptor	cytokine binding/protein dimerization activity	innate immune response	Immune system
DEPTOR	DEP Domain Containing MTOR Interacting Protein
DTX3L	deltex E3 ubiquitin ligase 3L		innate immune response
H2AFX	H2A.X variant histone	protein dimerization activity	innate immune response
HLA-DPB1	major histocompatibility complex, class II, DP beta 1	peptide antigen binding/MHC protein complex binding/antigen binding	innate immune response	Immune system
HLA-DQB1	major histocompatibility complex, class II, DQ beta 1	peptide antigen binding/MHC protein complex binding/antigen binding	innate immune response	Immune system
HLA-DRA	major histocompatibility complex, class II, DR alpha	peptide antigen binding/MHC protein complex binding/antigen binding	innate immune response	Immune system
HLA-DRB1	major histocompatibility complex, class II, DR beta 1	peptide antigen binding/MHC protein complex binding/antigen binding	innate immune response	Immune system
IFI16	interferon gamma inducible protein 16		innate immune response
IFIH1	interferon induced with helicase C domain 1	protein dimerization activity	innate immune response
IFIT1	interferon induced protein with tetratricopeptide repeats 1		innate immune response	Immune system
IFIT2	interferon induced protein with tetratricopeptide repeats 2		innate immune response	Immune system
IFIT3	interferon induced protein with tetratricopeptide repeats 3		innate immune response	Immune system
IFNAR1	interferon alpha and beta receptor subunit 1	cytokine binding	innate immune response	Immune system
IL15	interleukin 15		innate immune response	Immune system
ITGAV	integrin subunit alpha V	cytokine binding
MELK	Maternal Embryonic Leucine Zipper Kinase		regulation of cell cycle phase transition
MSH2	mutS homolog 2	protein dimerization activity	regulation of cell cycle phase transition
MX1	MX dynamin like GTPase 1		innate immune response	Immune system
OLR1	Oxidized Low Density Lipoprotein Receptor 1
PARP12	poly(ADP-ribose) polymerase family member 12
PARP9	poly(ADP-ribose) polymerase family member 9		innate immune response
PIK3CA	phosphatidylinositol-4,5-bisphosphate 3-kinase catalytic subunit alpha			Immune system
RAD51	RAD51 Recombinase		regulation of cell cycle phase transition
RIPK2	receptor interacting serine/threonine kinase 2	protein dimerization activity	innate immune response	Immune system
RRM2	ribonucleotide reductase regulatory subunit M2	protein dimerization activity	regulation of cell cycle phase transition
SAMD9	Sterile Alpha Motif Domain Containing 9
SAMSN1	SAM domain, SH3 domain and nuclear localization signals 1
SFXN1	Sideroflexin 1
SLC11A1	solute carrier family 11 member 1	protein dimerization activity	innate immune response
SPP1	secreted phosphoprotein 1
TAP2	transporter 2, ATP binding cassette subfamily B member	peptide antigen binding/antigen binding/protein dimerization activity	innate immune response
TNFRSF11A	TNF receptor superfamily member 11a	cytokine binding		Immune system
TREM2	triggering receptor expressed on myeloid cells 2		innate immune response
TYMS	thymidylate synthetase	protein dimerization activity
WDR76	WD Repeat Domain 76		regulation of cell cycle phase transition

## Sheet: STRING BRCA1met
73 genes down-regulated
name	gene description	GO enriched: Molecular function	GO enriched: Biological Process	Enriched pathway
APLNR	apelin receptor		regulation of developmental process
AREG	amphiregulin	signaling receptor binding
BATF3	basic leucine zipper ATF-like transcription factor 3	complex binding
BAX	BCL2 associated X, apoptosis regulator	complex binding	regulation of developmental process/regulation of cell death	Pathways in cancer/DNA damage response
BBC3	BCL2 binding component 3			DNA damage response
BRCA1	BRCA1 DNA repair associated		regulation of developmental process/regulation of cell death	DNA damage response
C5	complement C5	signaling receptor binding	regulation of developmental process
CCL14	C-C motif chemokine ligand 14	signaling receptor binding		Cytokine-cytokine interaction
CCL22	C-C motif chemokine ligand 22	signaling receptor binding		Cytokine-cytokine interaction
CD36	CD36 molecule	signaling receptor binding/complex binding	regulation of developmental process
CD44	CD44 molecule (Indian blood group)	signaling receptor binding/complex binding	regulation of cell death
CDH11	Cadherin 11
CDH5	cadherin 5	signaling receptor binding/complex binding	regulation of developmental process/regulation of cell death
CEACAM3	CEA cell adhesion molecule 3
CLEC14A	C-Type Lectin Domain Containing 14A
CPA3	Carboxypeptidase A3
CSF2	colony stimulating factor 2	signaling receptor binding	regulation of developmental process/regulation of cell death	Cytokine-cytokine interaction
CSF3	colony stimulating factor 3	signaling receptor binding		Cytokine-cytokine interaction
CXCL14	C-X-C motif chemokine ligand 14	signaling receptor binding		Cytokine-cytokine interaction
CXCR2	C-X-C motif chemokine receptor 2		regulation of developmental process/regulation of cell death	Cytokine-cytokine interaction
CXorf36	DPKD2B Divergent Protein Kinase Domain 2B
DAB2	DAB adaptor protein 2	signaling receptor binding/complex binding	regulation of developmental process/regulation of cell death
DDB2	damage specific DNA binding protein 2	complex binding		DNA damage response
DLL4	delta like canonical Notch ligand 4	signaling receptor binding
EGFR	epidermal growth factor receptor	complex binding	regulation of cell death	Pathways in cancer/Cytokine-cytokine interaction
EIF5AL1	eukaryotic translation initiation factor 5A like 1	complex binding	regulation of developmental process/regulation of cell death
FAS	Fas cell surface death receptor	death receptor activity/complex binding	regulation of cell death	Pathways in cancer/DNA damage response/Cytokine-cytokine interaction
FZD9	frizzled class receptor 9		regulation of developmental process/regulation of cell death	Pathways in cancer
GHR	growth hormone receptor		regulation of developmental process/regulation of cell death	Cytokine-cytokine interaction
GNG4	G protein subunit gamma 4			Pathways in cancer
HEY1	hes related family bHLH transcription factor with YRPW motif 1		regulation of developmental process
HIF1A	hypoxia inducible factor 1 subunit alpha	complex binding	regulation of developmental process/regulation of cell death	Pathways in cancer
IFNA1	interferon alpha 1	signaling receptor binding/complex binding		Cytokine-cytokine interaction
IL22RA1	interleukin 22 receptor subunit alpha 1			Cytokine-cytokine interaction
IL33	interleukin 33	signaling receptor binding	regulation of developmental process
IL4	interleukin 4	signaling receptor binding	regulation of developmental process/regulation of cell death	Cytokine-cytokine interaction
IL6	interleukin 6	signaling receptor binding	regulation of developmental process/regulation of cell death	Pathways in cancer/Cytokine-cytokine interaction
IRF2	Interferon Regulatory Factor 2
ITGA2	integrin subunit alpha 2	signaling receptor binding/complex binding		Pathways in cancer
KIT	KIT proto-oncogene, receptor tyrosine kinase		regulation of developmental process/regulation of cell death	Pathways in cancer/Cytokine-cytokine interaction
MAGEA1	MAGE Family Member A1
MET	MET proto-oncogene, receptor tyrosine kinase	complex binding	regulation of developmental process/regulation of cell death	Pathways in cancer/Cytokine-cytokine interaction
MS4A2	membrane spanning 4-domains A2	complex binding
NCR1	Natural Cytotoxicity Triggering Receptor 1
NGFR	nerve growth factor receptor	signaling receptor binding/death receptor activity/complex binding	regulation of developmental process/regulation of cell death	Cytokine-cytokine interaction
NT5E	5'-nucleotidase ecto		regulation of response to stress
OLFML2B	Olfactomedin Like 2B
PPARG	peroxisome proliferator activated receptor gamma		regulation of developmental process	Pathways in cancer
PROM1	prominin 1		regulation of developmental process
PTGS2	prostaglandin-endoperoxide synthase 2		regulation of developmental process/regulation of cell death	Pathways in cancer
REN	renin	signaling receptor binding
RPL23	Ribosomal Protein L23
S100A12	S100 calcium binding protein A12	signaling receptor binding
SELE	selectin E		regulation of response to stress
SERPINA1	Serpin Family A Member 1
SMAD5	SMAD family member 5		regulation of developmental process
SNAI1	snail family transcriptional repressor 1		regulation of developmental process/regulation of cell death
SNCA	synuclein alpha	complex binding	negative regulation of cell death
SOX10	SRY-box transcription factor 10		regulation of developmental process/regulation of cell death
TBX21	T-box transcription factor 21		regulation of developmental process
TGFB2	transforming growth factor beta 2	signaling receptor binding/complex binding	regulation of developmental process/regulation of cell death	Pathways in cancer/Cytokine-cytokine interaction
TGFB3	transforming growth factor beta 3	signaling receptor binding/complex binding	regulation of developmental process/regulation of cell death	Pathways in cancer/Cytokine-cytokine interaction
THBD	thrombomodulin		regulation of response to stress
TLR4	toll like receptor 4	signaling receptor binding	regulation of developmental process
TNFRSF10B	TNF receptor superfamily member 10b	death receptor activity		DNA damage response/Cytokine-cytokine interaction
TNFRSF11B	TNF receptor superfamily member 11b	signaling receptor binding		Cytokine-cytokine interaction
TNFRSF18	TNF receptor superfamily member 18	death receptor activity	regulation of cell death	Cytokine-cytokine interaction
TPSAB1/B2	tryptase alpha/beta 1-2		regulation of response to stress
TSLP	thymic stromal lymphopoietin	signaling receptor binding	regulation of cell death	Cytokine-cytokine interaction
TWF1	twinfilin actin binding protein 1	complex binding
TWIST1	twist family bHLH transcription factor 1		regulation of developmental process/regulation of cell death
TWIST2	twist family bHLH transcription factor 2		regulation of cell death
ZEB1	zinc finger E-box binding homeobox 1		regulation of developmental process
12 genes up-regulated
name	gene description	GO enriched: Molecular function	GO enriched: Biological Process	Enriched pathway
VEGFB	vascular endothelial growth factor B	signaling receptor binding	regulation of immune system process
IKBKB	inhibitor of nuclear factor kappa B kinase subunit beta	signaling receptor binding	regulation of immune system process
MGMT	O-6-methylguanine-DNA methyltransferase			DNA repair pathways
ICOSLG	inducible T cell costimulator ligand	signaling receptor binding	regulation of immune system process
FANCA	FA complementation group A		regulation of immune system process	DNA repair pathways
BID	BH3 interacting domain death agonist	signaling receptor binding	regulation of immune system process
ANLN	anillin, actin binding protein
EXO1	exonuclease 1			DNA repair pathways
DTX4	deltex E3 ubiquitin ligase 4
CXCL16	C-X-C motif chemokine ligand 16	signaling receptor binding
CEP55	centrosomal protein 55
VTCN1	V-set domain containing T cell activation inhibitor 1	signaling receptor binding	regulation of immune system process
